# Supplementary material for: Multicomponent Characterization of the Flower Bud of Panax notoginseng and Its Metabolites in Rat Plasma by Ultra-High Performance Liquid Chromatography/Ion Mobility Quadrupole Time-of-Flight Mass Spectrometry
Source: MDPI journal article supplement (doi:10.3390/molecules27249049), 2022-12-19
Supplement: s1 [file s1]

# Multicomponent Characterization of the Flower Bud of *Panax notoginseng* and Its Metabolites in Rat Plasma by Ultra-High Performance Liquid Chromatography/Ion Mobility Quadrupole Time-of-Flight Mass Spectrometry

Xiaonan Yang <sup>1,2,†</sup>, Ying Xiong <sup>1,2,†</sup>, Hongda Wang <sup>1,2,†</sup>, Meiting Jiang <sup>1,2</sup>, Xiaoyan Xu <sup>1,2</sup>, Yueguang Mi <sup>1,2</sup>, Jia Lou <sup>1,2</sup>, Xiaohang Li <sup>1,2</sup>, He Sun <sup>1,2</sup>, Yuying Zhao <sup>1,2</sup>, Xue Li <sup>1,2,\*</sup> and Wenzhi Yang <sup>1,2,\*</sup>

<sup>1</sup> State Key Laboratory of Component-based Chinese Medicine, Tianjin University of Traditional Chinese Medicine, 10 Poyanghu Road, , Tianjin 301617, China

<sup>2</sup> Haihe Laboratory of Modern Chinese Medicine, Tianjin University of Traditional Chinese Medicine, 10 Poyanghu Road, Tianjin 301617, China

\* Correspondence: tjdxsyzx@163.com (X.L.); wzyang0504@tjutc.edu.cn (W.Y.); Tel.: +86-022-5979-1833 (W.Y.)

† These authors contributed equally to this work.

## Contents

Figure S1 Stationary phase screening for the establishment of UPHLC/IM-QTOF-MS by showing the base peak chromatogram (BPCs) of PNF extract on 20 candidate reversed-phase chromatographic columns.

Figure S2 Histograms of the numbers of detected components under three different top N settings. The data were obtained by processing the negative HDMS<sup>E</sup> data using UNIFI, generating the lists of “Identified Components” and “Unknown Components”.

Figure S3 MS/MS spectra of 18 prototype components of PNF-administrated rat plasma.

Table S1 Information for 51 ginsenoside reference compounds used in this work.

Table S2 Information for the 219 saponins characterized from the flower bud of *Panax notoginseng*.

Table S3 Information for the 40 prototype components characterized from rat plasma.

Table S4 Information for 11 metabolites identified from rat plasma.

Table S5 CCS prediction of isomers in rat plasma based on ALLCCS and CCSbase.

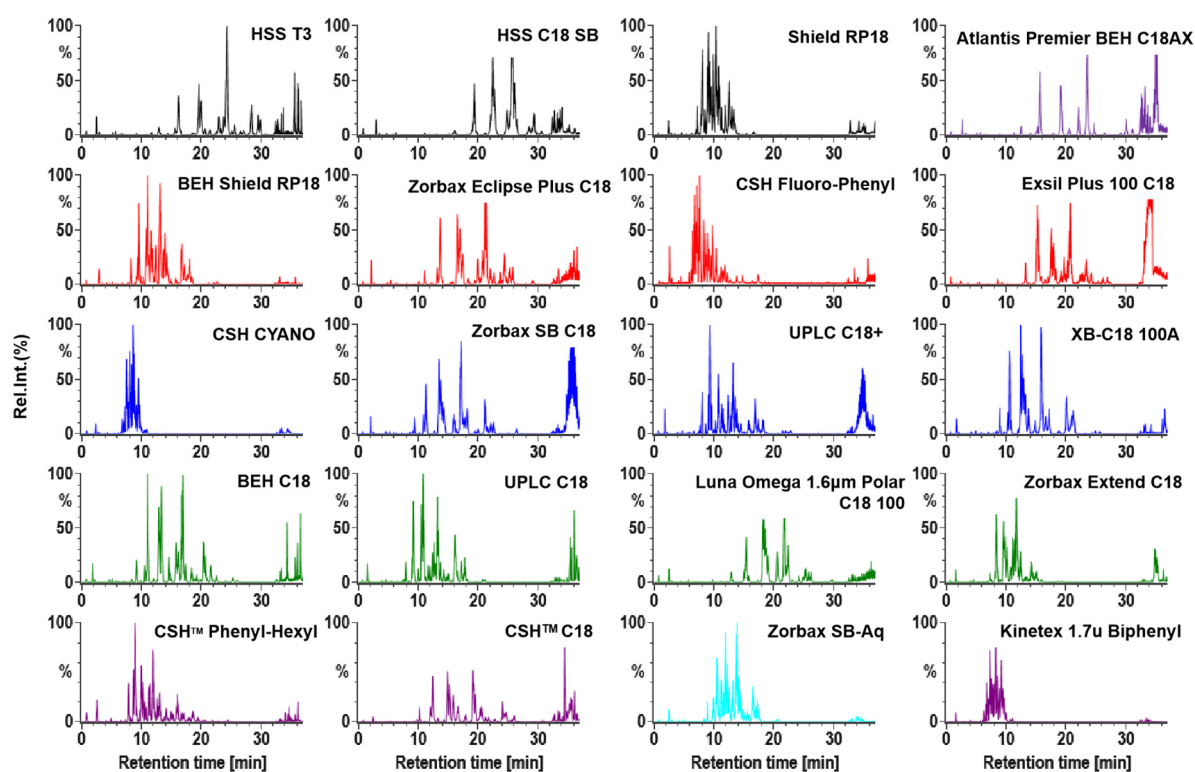

**Figure S1.** Stationary phase screening for the establishment of UPHLC/IM-QTOF-MS by showing the base peak chromatogram (BPCs) of PNF extract on 20 candidate reversed-phase chromatographic columns.

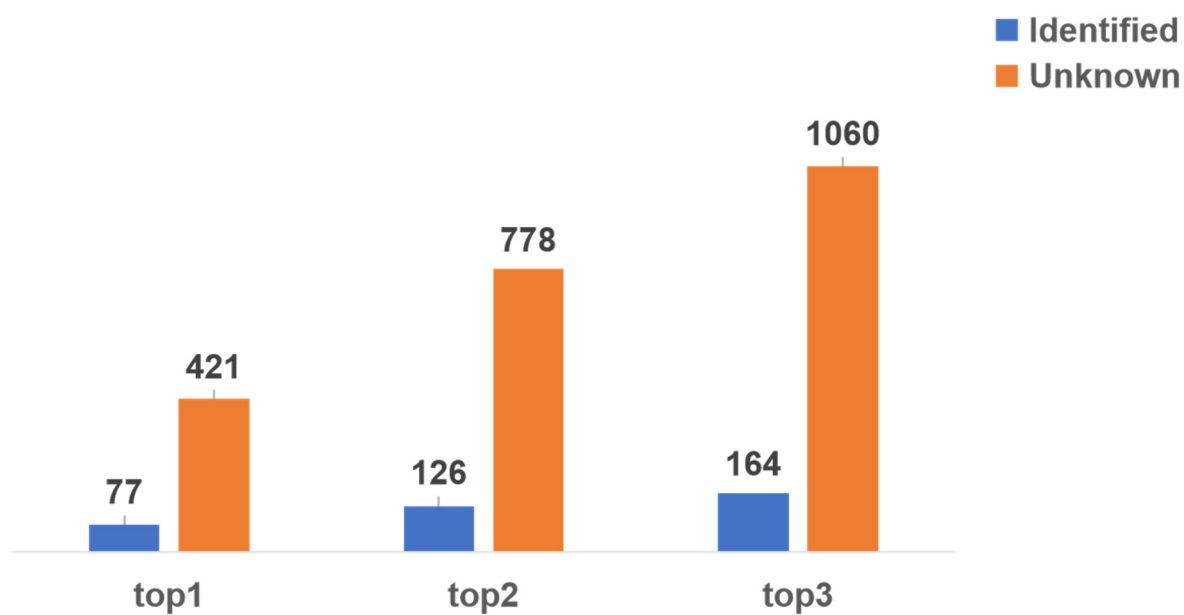

**Figure S2.** Histograms of the numbers of detected components under three different top N settings. The data were obtained by processing the negative HDMS<sup>E</sup> data using UNIFI, generating the lists of “Identified Components” and “Unknown Components”.

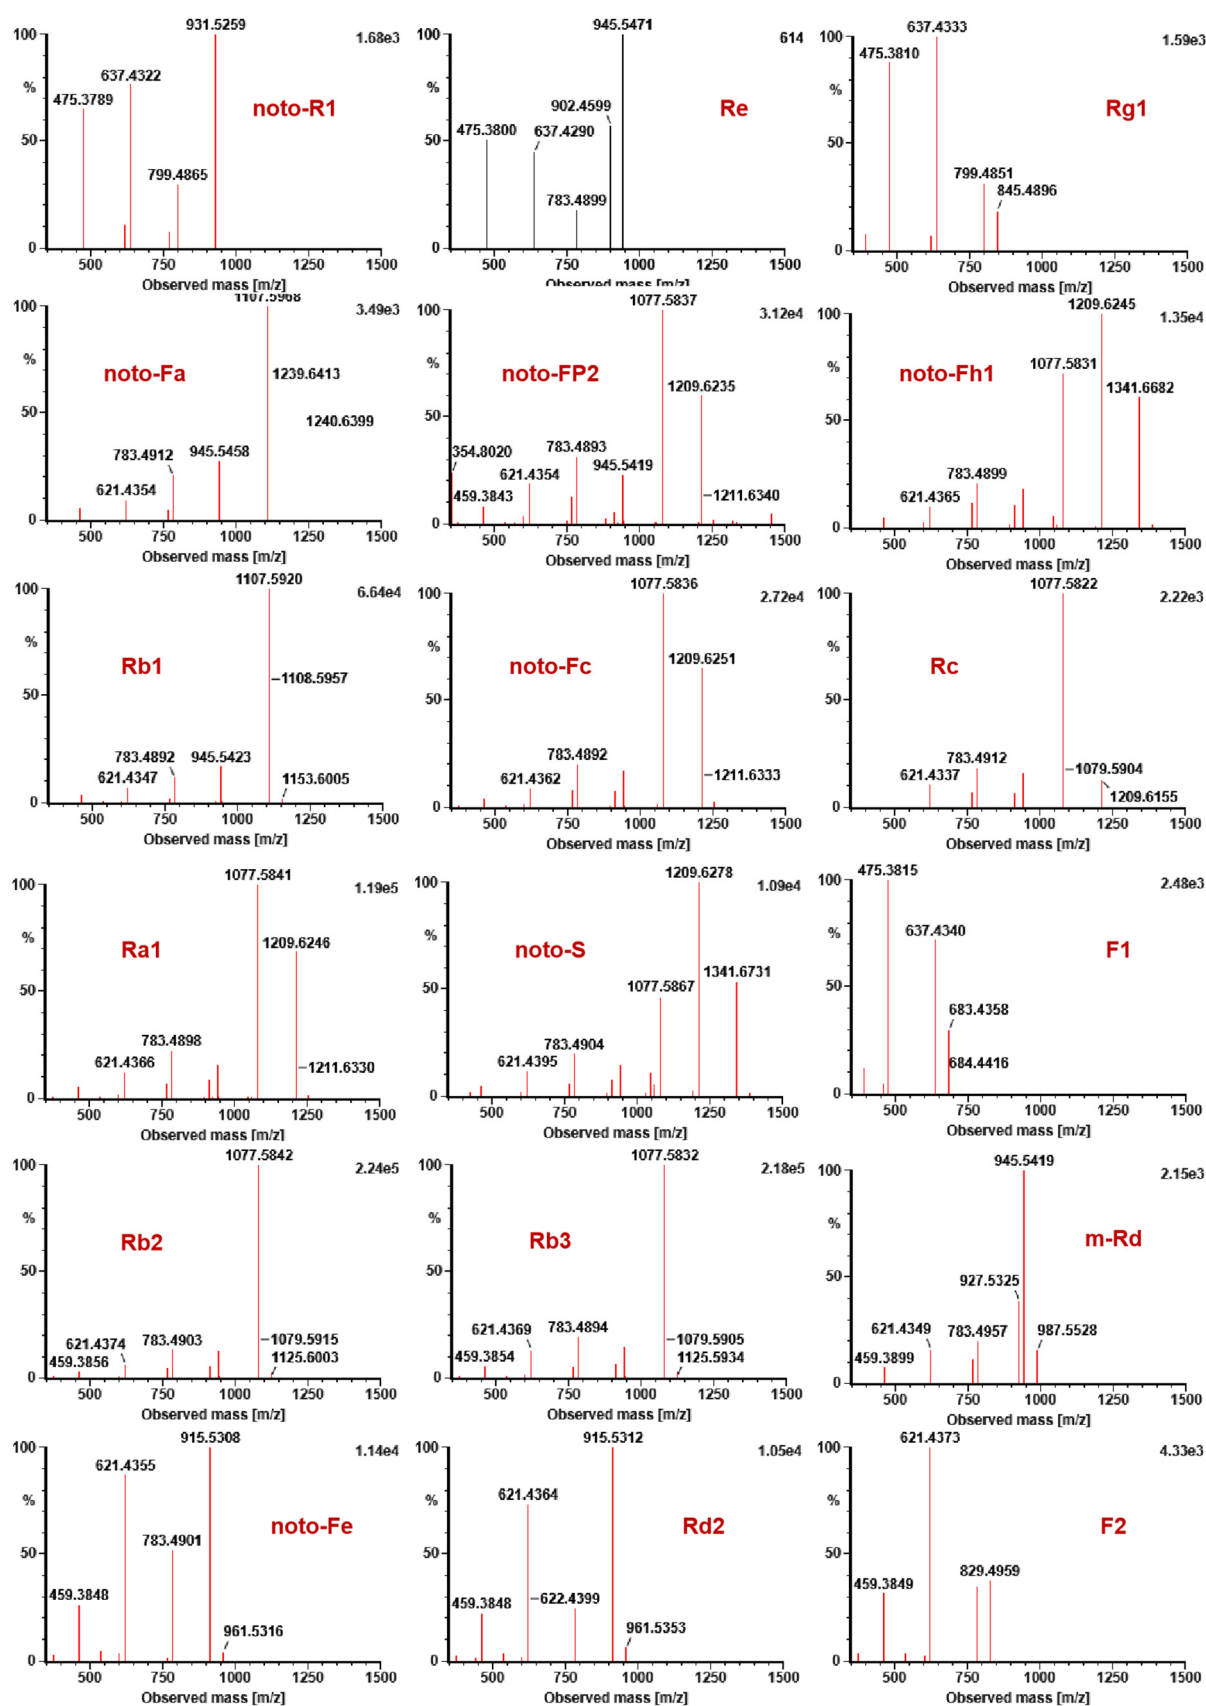

**Figure S3.** MS/MS spectra of 18 prototype components of PNF-administrated rat plasma. (Noto-R4, Ro, and m-Rb1 failed to provide MS/MS spectra due to low response).

**Table S1.** Information for 51 ginsenoside reference compounds used in this work.

| No. | Trivial name             | M.F.                                             | Exact Mass | Subclass |
|-----|--------------------------|--------------------------------------------------|------------|----------|
| 1   | ginsenoside F2           | C <sub>42</sub> H <sub>72</sub> O <sub>13</sub>  | 784.4901   | PPD      |
| 2   | ginsenoside Rb2          | C <sub>53</sub> H <sub>90</sub> O <sub>22</sub>  | 1078.5924  |          |
| 3   | ginsenoside Rb1          | C <sub>54</sub> H <sub>92</sub> O <sub>23</sub>  | 1108.6029  |          |
| 4   | ginsenoside Ra1          | C <sub>58</sub> H <sub>98</sub> O <sub>26</sub>  | 1210.6346  |          |
| 5   | ginsenoside Rd           | C <sub>48</sub> H <sub>82</sub> O <sub>18</sub>  | 946.5501   |          |
| 6   | 20(S)-ginsenoside Rh2    | C <sub>36</sub> H <sub>62</sub> O <sub>8</sub>   | 622.4445   |          |
| 7   | 20(R)-ginsenoside Rh2    | C <sub>36</sub> H <sub>62</sub> O <sub>8</sub>   | 622.4445   |          |
| 8   | notoginsenoside Fc       | C <sub>58</sub> H <sub>98</sub> O <sub>26</sub>  | 1210.4346  |          |
| 9   | notoginsenoside R4       | C <sub>59</sub> H <sub>100</sub> O <sub>27</sub> | 1240.6452  |          |
| 10  | notoginsenoside Ft1      | C <sub>47</sub> H <sub>80</sub> O <sub>17</sub>  | 916.5396   |          |
| 11  | ginsenoside Rb3          | C <sub>53</sub> H <sub>90</sub> O <sub>22</sub>  | 1078.5924  |          |
| 12  | ginsenoside Ra2          | C <sub>58</sub> H <sub>98</sub> O <sub>26</sub>  | 1210.6346  |          |
| 13  | 20(S)-ginsenoside Rg3    | C <sub>42</sub> H <sub>72</sub> O <sub>13</sub>  | 784.4973   |          |
| 14  | 20(R)-ginsenoside Rg3    | C <sub>42</sub> H <sub>72</sub> O <sub>13</sub>  | 784.4973   |          |
| 15  | notoginsenoside Fe       | C <sub>47</sub> H <sub>80</sub> O <sub>17</sub>  | 916.5396   |          |
| 16  | notoginsenoside Fa       | C <sub>59</sub> H <sub>100</sub> O <sub>27</sub> | 1240.6452  |          |
| 17  | ginsenoside Rs3          | C <sub>44</sub> H <sub>74</sub> O <sub>14</sub>  | 826.5079   |          |
| 18  | ginsenoside Rc           | C <sub>53</sub> H <sub>90</sub> O <sub>22</sub>  | 1078.5924  |          |
| 19  | compound K               | C <sub>36</sub> H <sub>62</sub> O <sub>8</sub>   | 622.4445   |          |
| 20  | notoginsenoside FP2      | C <sub>58</sub> H <sub>98</sub> O <sub>26</sub>  | 1210.6346  |          |
| 21  | notoginsenoside Fd       | C <sub>47</sub> H <sub>80</sub> O <sub>17</sub>  | 916.5396   |          |
| 22  | notoginsenoside S        | C <sub>63</sub> H <sub>106</sub> O <sub>30</sub> | 1342.6769  |          |
| 23  | notoginsenoside Fh1      | C <sub>63</sub> H <sub>106</sub> O <sub>30</sub> | 1342.6769  |          |
| 24  | ginsenoside Ra3          | C <sub>59</sub> H <sub>100</sub> O <sub>27</sub> | 1240.6452  |          |
| 25  | gypenoside XVII          | C <sub>48</sub> H <sub>82</sub> O <sub>18</sub>  | 946.5501   |          |
| 26  | ginsenoside Rd2          | C <sub>47</sub> H <sub>80</sub> O <sub>17</sub>  | 916.5396   |          |
| 27  | ginsenoside F3           | C <sub>41</sub> H <sub>70</sub> O <sub>13</sub>  | 770.4816   | PPT      |
| 28  | notoginsenoside R1       | C <sub>47</sub> H <sub>80</sub> O <sub>18</sub>  | 932.5345   |          |
| 29  | 20(R)-notoginsenoside R2 | C <sub>41</sub> H <sub>70</sub> O <sub>13</sub>  | 770.4816   |          |
| 30  | 20(S)-notoginsenoside R2 | C <sub>41</sub> H <sub>70</sub> O <sub>13</sub>  | 770.4816   |          |
| 31  | 20(R)-ginsenoside Rh1    | C <sub>36</sub> H <sub>62</sub> O <sub>9</sub>   | 638.4394   |          |
| 32  | 20(S)-ginsenoside Rh1    | C <sub>36</sub> H <sub>62</sub> O <sub>9</sub>   | 638.4394   |          |
| 33  | 20(R)-ginsenoside Rg2    | C <sub>42</sub> H <sub>72</sub> O <sub>13</sub>  | 784.4973   |          |
| 34  | 20(S)-ginsenoside Rg2    | C <sub>42</sub> H <sub>72</sub> O <sub>13</sub>  | 784.4973   |          |
| 35  | ginsenoside Rg1          | C <sub>42</sub> H <sub>72</sub> O <sub>14</sub>  | 800.4922   |          |
| 36  | vinaginsenoside R4       | C <sub>48</sub> H <sub>82</sub> O <sub>19</sub>  | 962.5450   |          |
| 37  | ginsenoside F5           | C <sub>41</sub> H <sub>70</sub> O <sub>13</sub>  | 770.4816   |          |

|    |                         |                                                 |           |       |
|----|-------------------------|-------------------------------------------------|-----------|-------|
| 38 | ginsenoside Rf          | C <sub>42</sub> H <sub>72</sub> O <sub>14</sub> | 800.4922  |       |
| 39 | ginsenoside Re          | C <sub>48</sub> H <sub>82</sub> O <sub>18</sub> | 946.5501  |       |
| 40 | chikusetsusaponin L5    | C <sub>46</sub> H <sub>78</sub> O <sub>17</sub> | 902.5239  |       |
| 41 | 20(S)-ginsenoside F1    | C <sub>36</sub> H <sub>62</sub> O <sub>9</sub>  | 638.4394  |       |
| 42 | ginsenoside F4          | C <sub>42</sub> H <sub>70</sub> O <sub>12</sub> | 766.4867  | Other |
| 43 | ginsenoside Rh3         | C <sub>36</sub> H <sub>60</sub> O <sub>7</sub>  | 604.4339  |       |
| 44 | ginsenoside Rk1         | C <sub>42</sub> H <sub>70</sub> O <sub>12</sub> | 766.4867  |       |
| 45 | ginsenoside Rk3         | C <sub>36</sub> H <sub>60</sub> O <sub>8</sub>  | 620.4288  |       |
| 46 | malonyl-ginsenoside Rb1 | C <sub>57</sub> H <sub>94</sub> O <sub>26</sub> | 1194.6033 | Mal   |
| 47 | malonyl-ginsenoside Rb2 | C <sub>56</sub> H <sub>92</sub> O <sub>25</sub> | 1164.5928 |       |
| 48 | malonyl-ginsenoside Rd  | C <sub>51</sub> H <sub>84</sub> O <sub>21</sub> | 1032.5505 |       |
| 49 | malonyl-ginsenoside Rc  | C <sub>56</sub> H <sub>92</sub> O <sub>25</sub> | 1164.5928 | OA    |
| 50 | ginsenoside Ro          | C <sub>48</sub> H <sub>76</sub> O <sub>19</sub> | 956.4981  |       |
| 51 | chikusetsusaponin IVa   | C <sub>42</sub> H <sub>66</sub> O <sub>14</sub> | 794.4453  |       |

**Table S2.** Information for the 219 saponins characterized from the flower bud of *Panax notoginseng*.

| No. | Observed RT (min) | Observed m/z               | Formula                                         | Mass error (ppm) | CCA(Å <sup>2</sup> ) | Adducts | ESI-MS <sup>2</sup>                                          | Identification                                                                                                                        |
|-----|-------------------|----------------------------|-------------------------------------------------|------------------|----------------------|---------|--------------------------------------------------------------|---------------------------------------------------------------------------------------------------------------------------------------|
| 1   | 4.95              | 977.5347 <sup>d/f</sup>    | C <sub>47</sub> H <sub>80</sub> O <sub>18</sub> | 2.09             | 314.48               | +HCOO   | 931.5317, 799.4833, 637.4327, 475.3777                       | quinquenoside L17 or isomer                                                                                                           |
| 2   | 4.99              | 1109.5779 <sup>b/e/f</sup> | C <sub>53</sub> H <sub>90</sub> O <sub>24</sub> | 2.66             | 331.14               | +HCOO   | 1063.5673, 931.5302, 637.4337, 475.3743                      | PPT-xyl-2rha-glc                                                                                                                      |
| 3   | 5.04              | 1007.5459 <sup>d/f</sup>   | C <sub>48</sub> H <sub>82</sub> O <sub>19</sub> | −2.34            | 324.85               | +HCOO   | 961.5355, 799.4810, 637.4307, 475.3768                       | chikusetsusaponin LM4 or isomer                                                                                                       |
| 4   | 5.28              | 977.5315 <sup>a</sup>      | C <sub>47</sub> H <sub>80</sub> O <sub>18</sub> | −1.15            | 322.41               | +HCOO   | 931.5263, 799.4839, 637.4322, 475.3793, 391.2845             | notoginsenoside R1                                                                                                                    |
| 5   | 5.67              | 945.5432 <sup>c/f</sup>    | C <sub>48</sub> H <sub>82</sub> O <sub>18</sub> | 0.38             | 324.43               | −H      | 799.4837, 637.4319, 475.3791, 391.2850                       | ginsenoside Rg18 or isomer                                                                                                            |
| 6   | 5.68              | 991.5484 <sup>a</sup>      | C <sub>48</sub> H <sub>82</sub> O <sub>18</sub> | 0.06             | 327.00               | +HCOO   | 945.5429, 783.4936, 637.4319, 619.4202, 475.3887, 391.2848   | ginsenoside Re                                                                                                                        |
| 7   | 5.73              | 845.4997 <sup>a</sup>      | C <sub>42</sub> H <sub>72</sub> O <sub>14</sub> | 0.21             | 297.89               | +HCOO   | 799.4851, 637.4321, 475.3798, 391.2867                       | ginsenoside Rg1                                                                                                                       |
| 8   | 6.01              | 1025.5559 <sup>d/f</sup>   | C <sub>48</sub> H <sub>84</sub> O <sub>20</sub> | 1.00             | 334.87               | +HCOO   | 979.5493, 817.4986, 655.4431, 493.3887, 475.3794             | ginsengenin-S3 or isomer                                                                                                              |
| 9   | 6.10              | 885.4862 <sup>b/e/f</sup>  | C <sub>48</sub> H <sub>72</sub> O <sub>13</sub> | −4.46            | 303.56               | −H      | 885.4840, 799.4862, 637.4324, 475.3806, 391.2857             | PPT-mal-2glc                                                                                                                          |
| 10  | 6.32              | 1139.5858 <sup>b/e/f</sup> | C <sub>54</sub> H <sub>92</sub> O <sub>25</sub> | 0.26             | 359.88               | +HCOO   | 1093.5788, 961.5443, 799.4830, 637.4346, 475.3806            | PPT-xyl-3glc                                                                                                                          |
| 11  | 6.42              | 1271.6292 <sup>d/f</sup>   | C <sub>58</sub> H <sub>98</sub> O <sub>27</sub> | 2.06             | 359.99               | +HCOO   | 1225.6248, 1093.5824, 961.5395, 799.4849, 637.4314, 475.3782 | notoginsenosides NL-B3 or isomer                                                                                                      |
| 12  | 6.48              | 1169.5967 <sup>d/f</sup>   | C <sub>54</sub> H <sub>92</sub> O <sub>24</sub> | 2.87             | 356.15               | +HCOO   | 1123.5938, 961.5368, 799.4857, 637.4347, 475.3740            | 6-O-[β-D-glucopyranosyl-(1→2)-β-D-glucopyranosyl]-20-O-[β-D-glucopyranosyl-(1→4)-β-D-glucopyranosyl]-20(S)-protopanaxatriol or isomer |
| 13  | 6.72              | 1139.5865 <sup>b/f</sup>   | C <sub>54</sub> H <sub>92</sub> O <sub>25</sub> | 0.88             | 365.09               | +HCOO   | 1093.5801, 961.5363, 799.4864, 781.4749, 637.4324, 475.3803  | PPT-xyl-3glc                                                                                                                          |
| 14  | 6.99              | 1209.6048 <sup>b/e/f</sup> | C <sub>61</sub> H <sub>94</sub> O <sub>24</sub> | −1.18            | 342.71               | −H      | 1123.5899, 961.5276, 799.4836, 637.4332, 475.3776            | PPT-mal-4glc                                                                                                                          |
| 15  | 7.13              | 1139.5868 <sup>b/f</sup>   | C <sub>53</sub> H <sub>90</sub> O <sub>23</sub> | 1.17             | 355.51               | +HCOO   | 1093.5806, 961.5403, 799.4856, 637.4334, 475.3791            | PPT-xyl-3glc                                                                                                                          |
| 16  | 7.37              | 1179.5825 <sup>b/e/f</sup> | C <sub>56</sub> H <sub>92</sub> O <sub>26</sub> | 1.77             | 347.77               | −H      | 1093.5811, 961.5401, 799.4880, 637.4314, 475.3809            | PPT-mal-xyl-3glc                                                                                                                      |
| 17  | 7.67              | 1155.5809 <sup>b/e/f</sup> | C <sub>53</sub> H <sub>90</sub> O <sub>24</sub> | −2.73            | 352.66               | +HCOO   | 1109.5719, 1091.5697, 797.4728, 635.4145, 473.3642, 455.3563 | C <sub>30</sub> H <sub>48</sub> O <sub>3</sub> -H <sub>2</sub> O-xyl-3glc                                                             |
| 18  | 7.70              | 1139.5885 <sup>b/f</sup>   | C <sub>53</sub> H <sub>90</sub> O <sub>23</sub> | 2.82             | 360.70               | +HCOO   | 1093.5831, 961.5359, 799.4851, 637.4339, 475.3794            | PPT-xyl-3glc                                                                                                                          |
| 19  | 7.81              | 1179.5829 <sup>b/e/f</sup> | C <sub>56</sub> H <sub>92</sub> O <sub>26</sub> | 2.11             | 343.99               | −H      | 1093.5828, 961.5361, 799.4853, 781.4738, 637.4317, 475.3796  | PPT-mal-xyl-3glc                                                                                                                      |

|    |       |                            |                                                  |       |        |       |                                                                                   |                                                                                |
|----|-------|----------------------------|--------------------------------------------------|-------|--------|-------|-----------------------------------------------------------------------------------|--------------------------------------------------------------------------------|
| 20 | 7.93  | 1007.5573 <sup>a</sup>     | C <sub>48</sub> H <sub>82</sub> O <sub>19</sub>  | 0.26  | 332.65 | +HCOO | 961.5380, 799.4842, 637.4299, 475.3807                                            | vina ginsenoside R <sub>4</sub>                                                |
| 21 | 8.21  | 1179.5815 <sup>b/e/f</sup> | C <sub>56</sub> H <sub>92</sub> O <sub>26</sub>  | 0.93  | 348.65 | −H    | 1093.5801, 961.5381, 799.4886, 781.4746, 637.4322, 475.3796                       | PPT-mal-xyl-3glc                                                               |
| 22 | 8.62  | 1179.5824 <sup>b/e/f</sup> | C <sub>56</sub> H <sub>92</sub> O <sub>26</sub>  | 1.69  | 346.23 | −H    | 1093.5826, 961.5357, 799.4850, 781.4749, 637.4304, 475.3789                       | PPT-mal-xyl-3glc                                                               |
| 23 | 8.94  | 1195.5739 <sup>b/e/f</sup> | C <sub>56</sub> H <sub>92</sub> O <sub>27</sub>  | −1.19 | 350.69 | −H    | 1109.5717, 1091.5532, 797.4655, 635.4175, 617.4071, 455.3482                      | C <sub>30</sub> H <sub>48</sub> O <sub>3</sub> -mal-2H <sub>2</sub> O-xyl-3glc |
| 24 | 9.04  | 1137.5712 <sup>b/f</sup>   | C <sub>53</sub> H <sub>88</sub> O <sub>23</sub>  | 0.77  | 355.38 | +HCOO | 1091.5652, 959.5242, 797.4716, 635.4144, 617.4066, 455.3552                       | C <sub>30</sub> H <sub>48</sub> O <sub>3</sub> -xyl-3glc                       |
| 25 | 9.14  | 1417.6852 <sup>b/f</sup>   | C <sub>64</sub> H <sub>108</sub> O <sub>31</sub> | −0.50 | 396.96 | +HCOO | 1371.6795, 1239.6379, 1107.5963, 945.5434, 783.4911, 621.4374, 459.3847, 353.1078 | PPD-2xyl-4glc                                                                  |
| 26 | 9.28  | 1049.5527 <sup>d/f</sup>   | C <sub>50</sub> H <sub>84</sub> O <sub>20</sub>  | −3.20 | 344.20 | +HCOO | 1003.5451, 961.5396, 799.4855, 637.4335, 475.3800, 391.2832                       | 6-acetyl ginsenoside Rg3 or isomer                                             |
| 27 | 10.03 | 947.5243 <sup>d/f</sup>    | C <sub>47</sub> H <sub>80</sub> O <sub>19</sub>  | 2.36  | 311.48 | +HCOO | 901.5179, 769.4735, 637.4312, 475.3807                                            | notoginsenoside Rw1 or isomer                                                  |
| 28 | 10.18 | 845.4899 <sup>d/f</sup>    | C <sub>42</sub> H <sub>72</sub> O <sub>14</sub>  | 0.09  | 301.66 | +HCOO | 799.4850, 637.4345, 491.3763                                                      | 20(R)-pseudoginsenoside F11 or isomer                                          |
| 29 | 10.43 | 947.5235 <sup>d/f</sup>    | C <sub>46</sub> H <sub>78</sub> O <sub>17</sub>  | 3.30  | 308.38 | +HCOO | 901.5196, 769.4787, 475.3762                                                      | chikusetsusaponin LM2 or isomer                                                |
| 30 | 10.69 | 845.4912 <sup>d/f</sup>    | C <sub>42</sub> H <sub>72</sub> O <sub>14</sub>  | 0.84  | 300.20 | +HCOO | 799.4856, 637.4346, 475.3800, 391.2863                                            | 20(S)-ginsenoside Rf or isomer                                                 |
| 31 | 10.86 | 1285.6450 <sup>a</sup>     | C <sub>59</sub> H <sub>100</sub> O <sub>27</sub> | 0.95  | 372.56 | +HCOO | 1239.6391, 1107.5986, 945.5443, 783.4914, 621.4364, 459.3857, 353.1086            | notoginsenosides R4                                                            |
| 32 | 11.39 | 815.4801 <sup>a</sup>      | C <sub>41</sub> H <sub>70</sub> O <sub>13</sub>  | 0.26  | 298.98 | +HCOO | 769.4732, 637.4328, 475.3802, 391.2842                                            | 20(S)-notoginsenoside R2                                                       |
| 33 | 11.67 | 1387.6756 <sup>b/e/f</sup> | C <sub>63</sub> H <sub>106</sub> O <sub>30</sub> | −0.16 | 383.00 | +HCOO | 1341.6694, 1209.6275, 1077.5866, 945.5441, 783.4914, 621.4379, 459.3848           | notoginsenoside Q or Fh1 (PPD-3xyl-3glc)                                       |
| 34 | 11.70 | 947.5218 <sup>a</sup>      | C <sub>46</sub> H <sub>78</sub> O <sub>17</sub>  | −0.34 | 321.67 | +HCOO | 901.5168, 769.4745, 637.4331, 475.3796, 391.2849                                  | chikusetsusaponin L5                                                           |
| 35 | 11.88 | 1315.6529 <sup>d/f</sup>   | C <sub>60</sub> H <sub>102</sub> O <sub>28</sub> | 0.48  | 375.87 | +HCOO | 1269.6491, 1107.5946, 945.5464, 783.4926, 621.4363, 459.3794                      | ginsenoside Rb5 or isomer                                                      |
| 36 | 12.02 | 1417.6849 <sup>b/f</sup>   | C <sub>64</sub> H <sub>108</sub> O <sub>31</sub> | 0.23  | 391.45 | +HCOO | 1371.6805, 1209.6280, 1077.5863, 945.5479, 783.4892, 621.4388, 459.3838           | PPD-4glc-2xyl                                                                  |
| 37 | 12.26 | 1387.6772 <sup>b/e/f</sup> | C <sub>63</sub> H <sub>106</sub> O <sub>30</sub> | −0.16 | 382.62 | +HCOO | 1341.6694, 1209.6283, 1077.5849, 945.5443, 783.4888, 621.4370, 459.3837           | PPD-3xyl-3glc                                                                  |
| 38 | 12.92 | 1285.6412 <sup>a</sup>     | C <sub>59</sub> H <sub>100</sub> O <sub>27</sub> | −0.53 | 372.92 | +HCOO | 1239.6357, 1107.5938, 945.5416, 783.4887, 621.4366, 459.3876                      | notoginsenoside Fa                                                             |
| 39 | 13.14 | 1341.6665 <sup>c/f</sup>   | C <sub>63</sub> H <sub>106</sub> O <sub>30</sub> | −2.32 | 384.79 | −H    | 1341.6664, 1209.6253, 1077.5841, 945.5425, 783.4892, 621.4363, 459.3841           | PPD-3xyl-2glc                                                                  |
| 40 | 13.31 | 829.4945 <sup>a</sup>      | C <sub>42</sub> H <sub>72</sub> O <sub>13</sub>  | −1.21 | 302.67 | +HCOO | 783.4869, 637.4288, 475.3795                                                      | 20(S)-ginsenoside Rg2                                                          |
| 41 | 13.69 | 683.4361 <sup>a</sup>      | C <sub>36</sub> H <sub>62</sub> O <sub>9</sub>   | −1.42 | −      | +HCOO | 637.4312, 475.3790, 391.2845                                                      | 20(S)-ginsenoside Rh1                                                          |
| 42 | 14.17 | 1285.6450 <sup>d/f</sup>   | C <sub>59</sub> H <sub>100</sub> O <sub>27</sub> | 0.47  | 367.32 | +HCOO | 1239.6385, 1077.5860, 945.5416, 783.4900, 621.4380, 459.3840                      | chikusetsusaponin VI or isomer                                                 |



|    |       |                            |                                                  |       |        |       |                                                                                    |                                |
|----|-------|----------------------------|--------------------------------------------------|-------|--------|-------|------------------------------------------------------------------------------------|--------------------------------|
| 43 | 14.34 | 1255.6334 <sup>d/f</sup>   | C <sub>58</sub> H <sub>98</sub> O <sub>26</sub>  | 0.45  | 357.40 | +HCOO | 1209.6279, 1077.5879, 945.5448, 783.4903, 621.4365, 459.3855                       | notoginsenoside-FZ or isomer   |
| 44 | 14.50 | 815.4802 <sup>a</sup>      | C <sub>41</sub> H <sub>70</sub> O <sub>13</sub>  | 0.38  | 300.73 | +HCOO | 769.4739, 637.4308, 475.3801, 391.2863                                             | ginsenoside F3                 |
| 45 | 14.90 | 1355.6619 <sup>b/e/f</sup> | C <sub>67</sub> H <sub>104</sub> O <sub>28</sub> | −1.65 | 380.71 | −H    | 1269.6495, 1107.5961, 945.5439, 783.4899, 621.4364, 459.3872                       | PPD-mal-5glc                   |
| 46 | 15.03 | 1325.6562 <sup>b/f</sup>   | C <sub>66</sub> H <sub>102</sub> O <sub>27</sub> | 0.50  | 370.80 | −H    | 1239.6386, 1107.5980, 945.5439, 783.4889, 621.4364, 459.3835                       | PPD-mal-xyl-4glc               |
| 47 | 15.18 | 1427.6713 <sup>b/e/f</sup> | C <sub>66</sub> H <sub>108</sub> O <sub>33</sub> | 0.90  | 399.08 | −H    | 1341.6725, 1209.6271, 1077.5861, 945.5463, 783.4899, 621.4379, 459.3838            | PPD-mal-3xyl-3glc              |
| 48 | 15.56 | 1255.6315 <sup>a</sup>     | C <sub>58</sub> H <sub>98</sub> O <sub>26</sub>  | 0.67  | 365.25 | +HCOO | 1209.6261, 1077.5841, 945.5425, 783.4896, 621.4359, 459.3872                       | notoginsenoside FP2            |
| 49 | 15.84 | 1387.6914 <sup>a</sup>     | C <sub>63</sub> H <sub>106</sub> O <sub>30</sub> | −0.53 | 302.07 | +HCOO | 1341.6689, 1209.6272, 1077.5856, 945.5442, 783.4902, 765.4810, 621.4379, 459.3851  | notoginsenoside Fh1            |
| 50 | 16.18 | 1153.6010 <sup>a</sup>     | C <sub>54</sub> H <sub>92</sub> O <sub>23</sub>  | −0.60 | 355.55 | +HCOO | 1107.5950, 1089.5862, 945.5424, 783.4899, 621.4378, 459.3842                       | ginsenoside Rb1                |
| 51 | 16.47 | 1325.6375 <sup>b/f</sup>   | C <sub>62</sub> H <sub>102</sub> O <sub>30</sub> | −0.58 | 373.85 | −H    | 1239.6383, 1107.5957, 945.5436, 783.4907, 621.4373, 459.3849                       | PPD- mal-xyl-4glc              |
| 52 | 16.58 | 1255.6320 <sup>d/f</sup>   | C <sub>58</sub> H <sub>98</sub> O <sub>26</sub>  | 0.12  | 361.25 | +HCOO | 1209.6275, 1077.5861, 945.5440, 783.4904, 621.4373, 459.3847                       | notoginsenoside-FZ or isomer   |
| 53 | 17.01 | 1285.6456 <sup>d/f</sup>   | C <sub>59</sub> H <sub>100</sub> O <sub>27</sub> | 2.56  | 378.02 | +HCOO | 1239.6411, 1077.5892, 945.5443, 783.4880, 621.4335, 459.3828                       | ginsenoside Ra3 or isomer      |
| 54 | 17.38 | 1427.6714 <sup>b/e/f</sup> | C <sub>66</sub> H <sub>108</sub> O <sub>33</sub> | 0.97  | 394.31 | −H    | 1341.6744, 1323.6604, 1209.6280, 1077.5861, 915.5334, 783.4920, 621.4379, 459.3842 | PPD-mal-3xyl-3glc              |
| 55 | 17.77 | 1295.6294 <sup>b/e/f</sup> | C <sub>61</sub> H <sub>100</sub> O <sub>29</sub> | 1.27  | 364.76 | −H    | 1209.6284, 1077.5880, 945.5444, 783.4899, 621.4377, 459.3847                       | PPD-mal-2xyl-3glc              |
| 56 | 17.83 | 955.4923 <sup>a</sup>      | C <sub>48</sub> H <sub>76</sub> O <sub>19</sub>  | 1.54  | 200.20 | −H    | 955.4915, 793.4887, 613.3763, 569.3852, 523.3783, 497.3650, 455.3536               | ginsenoside Ro                 |
| 57 | 17.93 | 855.4841 <sup>b/f</sup>    | C <sub>48</sub> H <sub>72</sub> O <sub>13</sub>  | −6.91 | 294.69 | −H    | 769.4763, 475.3796                                                                 | PPT-mal-xyl-glc                |
| 58 | 18.14 | 1285.6434 <sup>d/f</sup>   | C <sub>59</sub> H <sub>100</sub> O <sub>27</sub> | −0.10 | 376.64 | +HCOO | 1239.6378, 1077.5868, 945.5436, 783.4904, 621.4361, 459.3836                       | chikusetsusaponin VI or isomer |
| 59 | 18.31 | 1193.5966 <sup>a</sup>     | C <sub>57</sub> H <sub>94</sub> O <sub>26</sub>  | 0.49  | 265.46 | −H    | 1107.5965, 945.5437, 783.4904, 621.4378, 459.3853                                  | malonyl-ginsenoside Rb1        |
| 60 | 18.50 | 1295.6264 <sup>b/e/f</sup> | C <sub>61</sub> H <sub>100</sub> O <sub>29</sub> | −1.04 | 368.16 | −H    | 1209.6282, 1077.5860, 945.5454, 783.4882, 621.4351, 459.3817                       | PPD-mal-2xyl-3glc              |
| 61 | 18.72 | 1255.6323 <sup>a</sup>     | C <sub>58</sub> H <sub>98</sub> O <sub>26</sub>  | 0.80  | 368.97 | +HCOO | 1209.6268, 1077.5853, 945.5437, 783.4903, 621.4368, 459.3845                       | notoginsenoside Fc             |
| 62 | 18.87 | 1193.5969 <sup>b/f</sup>   | C <sub>57</sub> H <sub>94</sub> O <sub>26</sub>  | 0.72  | 355.53 | −H    | 1107.5960, 945.5431, 783.4903, 621.4369, 459.3849                                  | PPD-mal-4glc                   |
| 63 | 18.93 | 855.4754 <sup>b/e/f</sup>  | C <sub>44</sub> H <sub>72</sub> O <sub>16</sub>  | 0.75  | 302.22 | −H    | 769.4748, 475.3794                                                                 | PPT-mal-xyl-glc                |
| 64 | 19.43 | 1123.5893 <sup>a</sup>     | C <sub>53</sub> H <sub>90</sub> O <sub>22</sub>  | 0.37  | 275.15 | +HCOO | 1077.5830, 945.5417, 783.4889, 653.4628, 537.3445, 459.3856                        | ginsenoside Rc                 |
| 65 | 19.80 | 1193.5956 <sup>b/f</sup>   | C <sub>57</sub> H <sub>94</sub> O <sub>26</sub>  | −0.38 | 214.50 | −H    | 1149.6067, 1107.5959, 945.5434, 783.4903, 621.4369, 459.3848                       | PPD-mal-4glc                   |
| 66 | 19.86 | 1255.6317 <sup>a</sup>     | C <sub>58</sub> H <sub>98</sub> O <sub>26</sub>  | 0.32  | 363.00 | +HCOO | 1209.6260, 1077.5844, 945.5436, 783.4892, 621.4370, 459.3845                       | ginsenoside Ra1                |
| 67 | 20.19 | 1295.6268 <sup>b/e/f</sup> | C <sub>61</sub> H <sub>100</sub> O <sub>29</sub> | −0.73 | 366.26 | −H    | 1209.6269, 1077.5858, 945.5431, 783.4894, 621.4375, 459.3847                       | PPD-mal-2xyl-3glc              |
| 68 | 20.25 | 1193.5952 <sup>b/e/f</sup> | C <sub>57</sub> H <sub>94</sub> O <sub>26</sub>  | −0.68 | —      | −H    | 1149.6070, 1107.5955, 945.5430, 783.4901, 621.4373, 459.3847                       | PPD-mal-4glc                   |

|    |       |                                         |                                                  |       |        |       |                                                                         |                            |
|----|-------|-----------------------------------------|--------------------------------------------------|-------|--------|-------|-------------------------------------------------------------------------|----------------------------|
| 69 | 20.43 | 1193.5946 <sup>c/e/f</sup> <sub>f</sub> | C <sub>57</sub> H <sub>94</sub> O <sub>26</sub>  | −1.22 | 350.45 | −H    | 1149.6064, 1107.5957, 945.5432, 783.4893, 621.4378, 459.3828            | PPD-mal-4glc               |
| 70 | 20.67 | 1193.5948 <sup>b/e/f</sup>              | C <sub>57</sub> H <sub>94</sub> O <sub>26</sub>  | −1.07 | –      | −H    | 1107.5958, 945.5429, 783.4896, 621.4370, 459.3839                       | PPD-mal-4glc               |
| 71 | 21.11 | 1387.6721 <sup>a</sup>                  | C <sub>63</sub> H <sub>106</sub> O <sub>30</sub> | −1.5  | 381.91 | +HCOO | 1341.6676, 1209.6257, 1077.5843, 945.5428, 783.4897, 621.4367, 459.3850 | notoginsenoside S          |
| 72 | 21.42 | 1163.5851 <sup>b/e/f</sup>              | C <sub>56</sub> H <sub>92</sub> O <sub>25</sub>  | −0.34 | –      | −H    | 1077.5927, 945.5433, 783.4911, 621.4375, 459.3808                       | PPD-mal-xyl-3glc           |
| 73 | 21.55 | 683.4455 <sup>a</sup>                   | C <sub>36</sub> H <sub>62</sub> O <sub>9</sub>   | −0.48 | 275.30 | +HCOO | 637.4327, 621.4337, 475.3801, 391.2873                                  | ginsenoside F1             |
| 74 | 21.68 | 1163.5860 <sup>a</sup>                  | C <sub>56</sub> H <sub>92</sub> O <sub>25</sub>  | 0.44  | 348.79 | −H    | 1077.5850, 1059.5755, 945.5441, 783.4900, 621.4362, 459.3845            | malonyl-ginsenoside Rc     |
| 75 | 21.77 | 1295.6272 <sup>b/e/f</sup>              | C <sub>61</sub> H <sub>100</sub> O <sub>29</sub> | −0.42 | 374.67 | −H    | 1209.6284, 1077.5854, 945.5435, 783.4897, 621.4372, 459.3849            | PPD-mal-2xyl-3glc          |
| 76 | 21.85 | 1195.6267 <sup>d/f</sup>                | C <sub>56</sub> H <sub>94</sub> O <sub>24</sub>  | −0.28 | 370.43 | +HCOO | 1149.6059, 1107.5978, 945.5462, 783.4859, 621.4365, 459.3841            | quinquenoside R1 or isomer |
| 77 | 21.97 | 1163.5860 <sup>b/f</sup>                | C <sub>56</sub> H <sub>92</sub> O <sub>25</sub>  | 0.44  | –      | −H    | 1077.5853, 945.5437, 783.4878, 621.4337, 459.3830                       | PPD-mal-xyl-3glc           |
| 78 | 22.04 | 1165.6157 <sup>b/f</sup>                | C <sub>55</sub> H <sub>92</sub> O <sub>23</sub>  | −3.54 | 359.82 | +HCOO | 1119.5917, 1077.5852, 945.5415, 783.4886, 621.4348, 459.3859            | PPD-Ace-xyl-3glc           |
| 79 | 22.07 | 1279.6151 <sup>b/e/f</sup>              | C <sub>57</sub> H <sub>100</sub> O <sub>31</sub> | −1.94 | 282.37 | −H    | 1107.5958, 945.5442, 783.4866, 621.4349, 459.3873                       | PPD-Dimal-4glc             |
| 80 | 22.09 | 1295.6435 <sup>b/e/f</sup>              | C <sub>58</sub> H <sub>104</sub> O <sub>31</sub> | −4.15 | 370.92 | −H    | 1209.6264, 1077.5845, 945.5424, 783.4903, 621.4374, 459.3841            | PPD-mal-2xyl-3glc          |
| 81 | 22.21 | 1163.5852 <sup>b/f</sup>                | C <sub>56</sub> H <sub>92</sub> O <sub>25</sub>  | −0.22 | 342.77 | −H    | 1077.5854, 945.5439, 783.4902, 621.4365, 459.3849                       | PPD-mal-xyl-3glc           |
| 82 | 22.23 | 1279.6135 <sup>b/e/f</sup>              | C <sub>57</sub> H <sub>100</sub> O <sub>31</sub> | −3.19 | 282.37 | −H    | 1107.5959, 945.5433, 783.4897, 621.4363, 459.3831                       | PPD-Dimal-4glc             |
| 83 | 22.24 | 1119.5961 <sup>c/f</sup>                | C <sub>55</sub> H <sub>92</sub> O <sub>23</sub>  | 0.39  | 353.83 | −H    | 1077.5854, 783.4904, 621.4381, 459.3856                                 | PPD-Ace-xyl-3glc           |
| 84 | 22.59 | 1123.5885 <sup>a</sup>                  | C <sub>53</sub> H <sub>90</sub> O <sub>22</sub>  | 0.04  | 359.67 | +HCOO | 1077.5821, 945.5406, 783.4878, 621.4378, 459.3845                       | ginsenoside Rb2            |
| 85 | 22.86 | 1295.6253 <sup>b/e/f</sup>              | C <sub>61</sub> H <sub>100</sub> O <sub>29</sub> | −1.89 | 362.70 | −H    | 1209.6273, 1077.5848, 945.5426, 783.4900, 621.4372, 459.3836            | PPD-mal-2xyl-3glc          |
| 86 | 22.87 | 1119.5961 <sup>c/e/f</sup> <sub>f</sub> | C <sub>55</sub> H <sub>92</sub> O <sub>23</sub>  | 0.39  | 353.17 | −H    | 1077.5853, 945.5441, 783.4903, 621.4367, 459.3849                       | PPD-Ace-xyl-3glc           |
| 87 | 23.04 | 1163.5846 <sup>b/e/f</sup>              | C <sub>56</sub> H <sub>92</sub> O <sub>25</sub>  | −0.77 | –      | −H    | 1077.5843, 945.5442, 783.4853, 621.4353, 459.3890                       | PPD-mal-xyl-3glc           |
| 88 | 23.31 | 1163.5840 <sup>b/e/f</sup>              | C <sub>56</sub> H <sub>92</sub> O <sub>25</sub>  | −1.31 | 351.16 | −H    | 1077.5836, 945.5427, 783.4899, 621.4361, 459.3848                       | PPD-mal-xyl-3glc           |
| 89 | 23.66 | 1295.6442 <sup>b/e/f</sup>              | C <sub>58</sub> H <sub>104</sub> O <sub>31</sub> | −3.61 | 369.48 | −H    | 1209.6276, 1077.5843, 945.5437, 783.4896, 621.4360, 459.3852            | PPD-mal-2xyl-3glc          |
| 90 | 23.69 | 1123.5891 <sup>a</sup>                  | C <sub>53</sub> H <sub>90</sub> O <sub>22</sub>  | −1.29 | 347.37 | +HCOO | 1077.5834, 945.5422, 783.4891, 621.4364, 459.3842                       | ginsenoside Rb3            |
| 91 | 23.93 | 1279.5942 <sup>b/e/f</sup>              | C <sub>60</sub> H <sub>96</sub> O <sub>29</sub>  | −1.76 | 278.92 | −H    | 1107.5952, 945.5413, 783.4886, 621.4369, 459.3841                       | PPD-Dimal-4glc             |
| 92 | 23.97 | 1123.5891 <sup>d/f</sup>                | C <sub>53</sub> H <sub>90</sub> O <sub>22</sub>  | −1.36 | 357.13 | +HCOO | 1077.5840, 945.5433, 783.4892, 621.4366, 459.3841                       | ginsenoside Rc or isomer   |
| 93 | 23.99 | 1295.6437 <sup>b/e/f</sup>              | C <sub>58</sub> H <sub>104</sub> O <sub>31</sub> | −4.00 | 374.68 | −H    | 1209.6282, 1077.5855, 945.5428, 783.4889, 621.4371, 459.3855            | PPD-mal-2xyl-3glc          |
| 94 | 24.27 | 1295.6269 <sup>b/e/f</sup>              | C <sub>61</sub> H <sub>100</sub> O <sub>29</sub> | −0.66 | –      | −H    | 1209.6274, 1077.5854, 945.5438, 783.4898, 621.4371, 459.3848            | PPD-mal-2xyl-3glc          |

|     |       |                            |                                                  |       |        |       |                                                              |                              |
|-----|-------|----------------------------|--------------------------------------------------|-------|--------|-------|--------------------------------------------------------------|------------------------------|
| 95  | 24.64 | 1295.6260 <sup>b/e/f</sup> | C <sub>61</sub> H <sub>100</sub> O <sub>29</sub> | −1.35 | 365.66 | −H    | 1209.6266, 1077.5850, 945.5430, 783.4895, 621.4371, 459.3844 | PPD-mal-2xyl-3glc            |
| 96  | 24.67 | 1163.5858 <sup>a</sup>     | C <sub>56</sub> H <sub>92</sub> O <sub>25</sub>  | 0.26  | 354.92 | −H    | 1077.5860, 1059.5721, 945.5433, 783.4896, 621.4357, 459.3852 | malonylginsenoside Rb2       |
| 97  | 24.81 | 1123.6076 <sup>d/f</sup>   | C <sub>53</sub> H <sub>90</sub> O <sub>22</sub>  | 1.30  | 357.12 | +HCOO | 1077.5865, 945.5421, 783.4893, 621.4356, 459.3807            | notoginsenoside L or isomer  |
| 98  | 24.85 | 1255.6309 <sup>d/f</sup>   | C <sub>58</sub> H <sub>98</sub> O <sub>26</sub>  | −1.45 | 284.63 | +HCOO | 1209.6256, 1077.5844, 945.5424, 783.4896, 621.4362, 459.3839 | notoginsenoside-FZ or isomer |
| 99  | 25.41 | 1165.5999 <sup>b/e/f</sup> | C <sub>55</sub> H <sub>92</sub> O <sub>23</sub>  | −2.64 | 364.03 | +HCOO | 1119.5927, 1077.5849, 945.5417, 783.4885, 621.4369, 459.3845 | PPD-Ace-xyl-3glc             |
| 100 | 25.43 | 1137.6066 <sup>d/f</sup>   | C <sub>54</sub> H <sub>92</sub> O <sub>22</sub>  | 2.06  | 349.98 | +HCOO | 1091.6030, 945.5491, 783.4910, 621.4379, 459.3836            | gypenoside V or isomer       |
| 101 | 25.63 | 1249.5844 <sup>b/e/f</sup> | C <sub>59</sub> H <sub>94</sub> O <sub>28</sub>  | −1.19 | 358.25 | −H    | 1077.5835, 945.5442, 783.4898, 621.4364, 459.3829            | PPD-Dimal-xyl-3glc           |
| 102 | 25.68 | 1163.5844 <sup>b/e/f</sup> | C <sub>56</sub> H <sub>92</sub> O <sub>25</sub>  | −0.90 | 346.28 | −H    | 1077.5844, 945.5423, 783.4899, 621.4364, 459.3845            | PPD-mal-xyl-3glc             |
| 103 | 25.83 | 1119.5956 <sup>c/e/f</sup> | C <sub>55</sub> H <sub>92</sub> O <sub>23</sub>  | −0.05 | 278.92 | −H    | 1077.5846, 945.5440, 783.4895, 621.4361, 459.3856            | PPD-Ace-xyl-3glc             |
| 104 | 25.95 | 1163.5842 <sup>b/e/f</sup> | C <sub>56</sub> H <sub>92</sub> O <sub>25</sub>  | −1.11 | 279.06 | −H    | 1077.5843, 945.5430, 783.4901, 621.4371, 459.3841            | PPD-mal-xyl-3glc             |
| 105 | 26.03 | 1205.5949 <sup>b/e/f</sup> | C <sub>58</sub> H <sub>94</sub> O <sub>26</sub>  | −0.96 | 347.64 | −H    | 1119.5936, 1077.5877, 945.5422, 783.4886, 621.4379, 459.3833 | PPD-mal-Ace-xyl-3glc         |
| 106 | 26.24 | 1163.5833 <sup>b/e/f</sup> | C <sub>56</sub> H <sub>92</sub> O <sub>25</sub>  | −1.92 | 343.52 | −H    | 1077.5840, 945.5425, 783.4895, 621.4366, 459.3842            | PPD-mal-xyl-3glc             |
| 107 | 26.97 | 1119.5969 <sup>c/f</sup>   | C <sub>55</sub> H <sub>92</sub> O <sub>23</sub>  | 1.11  | 365.10 | −H    | 1077.5856, 945.5439, 783.4910, 459.3843                      | PPD-Ace-xyl-3glc             |
| 108 | 27.13 | 1163.5837 <sup>b/e/f</sup> | C <sub>56</sub> H <sub>92</sub> O <sub>25</sub>  | −1.50 | 267.37 | −H    | 1077.5833, 945.5418, 783.4889, 621.4364, 459.3841            | PPD-mal-xyl-3glc             |
| 109 | 27.34 | 1119.5975 <sup>c/f</sup>   | C <sub>55</sub> H <sub>92</sub> O <sub>23</sub>  | 1.64  | 334.07 | −H    | 1077.5852, 945.5430, 783.4901, 621.4375, 459.3837            | PPD-Ace-xyl-3glc             |
| 110 | 27.35 | 1163.5827 <sup>c/e/f</sup> | C <sub>56</sub> H <sub>92</sub> O <sub>25</sub>  | −2.40 | 342.82 | −H    | 1077.5852, 945.5430, 783.4901, 621.4375, 459.3837            | PPD-mal-xyl-3glc             |
| 111 | 27.67 | 1163.5836 <sup>b/e/f</sup> | C <sub>56</sub> H <sub>92</sub> O <sub>25</sub>  | −1.66 | 349.64 | −H    | 1077.5842, 945.5424, 783.4889, 621.4363, 459.3842            | PPD-mal-xyl-3glc             |
| 112 | 27.75 | 1249.5840 <sup>c/e/f</sup> | C <sub>59</sub> H <sub>94</sub> O <sub>28</sub>  | −1.51 | 358.93 | −H    | 1077.5847, 945.5433, 621.4371, 459.3852                      | PPD-Dimal-xyl-3glc           |
| 113 | 27.95 | 1163.5853 <sup>b/f</sup>   | C <sub>56</sub> H <sub>92</sub> O <sub>25</sub>  | −0.16 | 278.78 | −H    | 1077.5831, 945.5420, 783.4892, 621.4264, 459.3834            | PPD-mal-xyl-3glc             |
| 114 | 28.24 | 1163.5837 <sup>b/e/f</sup> | C <sub>56</sub> H <sub>92</sub> O <sub>25</sub>  | −1.53 | 287.08 | −H    | 1077.5835, 945.5424, 783.4891, 621.4364, 459.3843            | PPD-mal-xyl-3glc             |
| 115 | 28.40 | 1295.6251 <sup>b/e/f</sup> | C <sub>61</sub> H <sub>100</sub> O <sub>29</sub> | −2.04 | 359.27 | −H    | 1209.6257, 1077.5825, 945.5415, 783.4886, 621.4358, 459.3844 | PPD-mal-2xyl-3glc            |
| 116 | 28.71 | 991.5467 <sup>a</sup>      | C <sub>48</sub> H <sub>82</sub> O <sub>18</sub>  | −1.20 | 331.74 | +HCOO | 945.5414, 783.4889, 621.4363, 459.3844                       | ginsenoside Rd               |
| 117 | 28.94 | 1163.5860 <sup>b/f</sup>   | C <sub>56</sub> H <sub>92</sub> O <sub>25</sub>  | 0.44  | 362.64 | −H    | 1077.5866, 945.5359, 783.4867, 621.4315, 459.3817            | PPD-mal-xyl-3glc             |
| 118 | 29.19 | 1249.5853 <sup>b/e/f</sup> | C <sub>59</sub> H <sub>94</sub> O <sub>28</sub>  | −0.47 | 356.61 | −H    | 1077.5860, 945.5427, 783.4894, 621.4360, 459.3845            | PPD-Dimal-xyl-3glc           |
| 119 | 29.49 | 1205.5971 <sup>b/e/f</sup> | C <sub>58</sub> H <sub>94</sub> O <sub>26</sub>  | 0.86  | 346.54 | −H    | 1119.5960, 1077.5864, 945.5445, 783.4911, 621.4378, 459.3840 | PPD-mal-Ace-xyl-3glc         |
| 120 | 29.76 | 1093.5802 <sup>b/e/f</sup> | C <sub>53</sub> H <sub>90</sub> O <sub>23</sub>  | 0.17  | 351.04 | −H    | 1047.5738, 915.5288, 753.4805, 621.4349, 459.3830            | PPD-2xyl-2glc                |

|     |       |                            |                                                 |       |        |       |                                                               |                                        |
|-----|-------|----------------------------|-------------------------------------------------|-------|--------|-------|---------------------------------------------------------------|----------------------------------------|
| 121 | 29.95 | 1249.5857 <sup>b/e/f</sup> | C <sub>59</sub> H <sub>94</sub> O <sub>28</sub> | −0.15 | 359.08 | −H    | 1077.5859, 945.5401, 783.4889, 621.4357, 459.3859             | PPD-Dimal-xyl-3glc                     |
| 122 | 29.99 | 1205.5949 <sup>b/e/f</sup> | C <sub>58</sub> H <sub>94</sub> O <sub>26</sub> | −0.96 | 368.19 | −H    | 1119.5939, 1077.5868, 945.5465, 783.4856, 621.4373, 459.3851  | PPD-mal-Ace-xyl-3glc                   |
| 123 | 30.26 | 1249.5862 <sup>b/e/f</sup> | C <sub>59</sub> H <sub>94</sub> O <sub>28</sub> | 0.25  | –      | −H    | 1077.5860, 945.5461, 783.4899, 621.4377, 459.3850             | PPD-Dimal-xyl-3glc                     |
| 124 | 30.40 | 1205.5978 <sup>b/e/f</sup> | C <sub>58</sub> H <sub>94</sub> O <sub>26</sub> | 1.44  | 357.28 | −H    | 1119.5965, 1077.5849, 945.5417, 783.4902, 621.4393, 459.3855  | PPD-mal-Ace-xyl-3glc                   |
| 125 | 30.51 | 1207.6108 <sup>b/e/f</sup> | C <sub>57</sub> H <sub>94</sub> O <sub>24</sub> | 2.04  | 389.96 | +HCOO | 1161.6086, 1119.5955, 1077.5862, 783.4927, 621.4374, 459.3842 | PPD-2Ace-xyl-3glc                      |
| 126 | 30.63 | 1249.5826 <sup>b/e/f</sup> | C <sub>59</sub> H <sub>94</sub> O <sub>28</sub> | −2.63 | 363.75 | −H    | 1077.5864, 945.5442, 783.4905, 621.4372, 459.3839             | PPD-Dimal-xyl-3glc                     |
| 127 | 30.81 | 1031.5443 <sup>a</sup>     | C <sub>51</sub> H <sub>84</sub> O <sub>21</sub> | 1.00  | 340.41 | −H    | 945.5435, 783.4904, 621.4387, 459.3845                        | malonylginsenoside Rd                  |
| 128 | 30.91 | 1093.5811 <sup>b/e/f</sup> | C <sub>53</sub> H <sub>90</sub> O <sub>23</sub> | 1.00  | 347.43 | −H    | 1047.5737, 915.5361, 753.4784, 621.4368, 459.3859             | PPD-2xyl-2glc                          |
| 129 | 30.98 | 1249.5873 <sup>b/e/f</sup> | C <sub>59</sub> H <sub>94</sub> O <sub>28</sub> | 1.13  | –      | −H    | 1077.5864, 945.5387, 783.4928, 621.4345, 459.3815             | PPD-Dimal-xyl-3glc                     |
| 130 | 31.04 | 1093.5818 <sup>b/f</sup>   | C <sub>52</sub> H <sub>88</sub> O <sub>21</sub> | −1.75 | 347.43 | +HCOO | 1047.5727, 915.5441, 753.4770, 621.4371, 459.3876             | notoginsenoside O or isomer            |
| 131 | 31.10 | 1205.5955 <sup>b/e/f</sup> | C <sub>58</sub> H <sub>94</sub> O <sub>26</sub> | −0.46 | 351.34 | −H    | 1119.5958, 1077.5868, 945.5441, 783.4876, 621.4343, 459.3878  | PPD-mal-Ace-xyl-3glc                   |
| 132 | 31.25 | 1249.5855 <sup>b/e/f</sup> | C <sub>59</sub> H <sub>94</sub> O <sub>28</sub> | −0.31 | 363.76 | −H    | 1077.5858, 945.5440, 783.4906, 621.4361, 459.3842             | PPD-Dimal-xyl-3glc                     |
| 133 | 31.35 | 1205.5974 <sup>b/e/f</sup> | C <sub>58</sub> H <sub>94</sub> O <sub>26</sub> | 1.11  | 351.34 | −H    | 1119.5970, 1077.5855, 945.5436, 783.4907, 621.4373, 459.3851  | PPD-mal-Ace-xyl-3glc                   |
| 134 | 31.55 | 1165.6015 <sup>b/e/f</sup> | C <sub>55</sub> H <sub>92</sub> O <sub>23</sub> | −1.22 | 363.62 | +HCOO | 1119.5943, 1077.5847, 945.5485, 783.4889, 621.4335, 459.3856  | PPD-Ace-xyl-3glc                       |
| 135 | 31.66 | 1249.5846 <sup>b/e/f</sup> | C <sub>59</sub> H <sub>94</sub> O <sub>28</sub> | −1.03 | 357.75 | −H    | 1077.5854, 945.5431, 783.4903, 621.4370, 459.3844             | PPD-Dimal-xyl-3glc                     |
| 136 | 31.67 | 1205.5964 <sup>b/e/f</sup> | C <sub>58</sub> H <sub>94</sub> O <sub>26</sub> | 0.28  | 346.77 | −H    | 1119.5955, 1077.5848, 945.5429, 783.4906, 621.4368, 459.3847  | PPD-mal-Ace-xyl-3glc                   |
| 137 | 31.90 | 1031.5420 <sup>d/f</sup>   | C <sub>51</sub> H <sub>84</sub> O <sub>21</sub> | −1.20 | 323.41 | −H    | 945.5417, 783.4897, 621.4367, 459.3845                        | malonylfloralginsenoside Rd4 or isomer |
| 138 | 31.94 | 1121.4425 <sup>c/e/f</sup> | C <sub>43</sub> H <sub>78</sub> O <sub>33</sub> | 6.46  | 330.93 | −H    | 945.5424, 783.4906, 459.3844                                  | PPD-glurA-3glc                         |
| 139 | 31.94 | 991.5484 <sup>c/f</sup>    | C <sub>48</sub> H <sub>82</sub> O <sub>18</sub> | −0.46 | 332.37 | +HCOO | 945.5424, 783.4906, 621.4371, 459.3844                        | chikusetsusaponin FK7 or isomer        |
| 140 | 32.17 | 1033.5569 <sup>b/e/f</sup> | C <sub>50</sub> H <sub>84</sub> O <sub>19</sub> | 1.01  | 213.18 | +HCOO | 987.5544, 945.5428, 783.4905, 621.4370, 459.3838              | PPD-Ace-3glc                           |
| 141 | 32.44 | 1265.6203 <sup>b/e/f</sup> | C <sub>60</sub> H <sub>98</sub> O <sub>28</sub> | 2.46  | 362.88 | −H    | 1179.6118, 1047.5701, 915.5317, 783.4894, 621.4398, 459.3867  | PPD-mal-3xyl-2glc                      |
| 142 | 32.55 | 987.5539 <sup>c/f</sup>    | C <sub>50</sub> H <sub>84</sub> O <sub>19</sub> | 0.50  | 340.81 | −H    | 945.5423, 783.4894, 621.4376, 459.3848                        | PPD-Ace-3glc                           |
| 143 | 32.65 | 1205.5984 <sup>b/e/f</sup> | C <sub>58</sub> H <sub>94</sub> O <sub>26</sub> | 1.94  | 349.93 | −H    | 1119.6081, 1077.5871, 945.5346, 783.4859, 621.4466, 459.3820  | PPD-mal-Ace-xyl-3glc                   |
| 144 | 32.92 | 769.4389 <sup>d/f</sup>    | C <sub>40</sub> H <sub>66</sub> O <sub>14</sub> | 1.20  | 284.23 | −H    | 769.4389, 637.4305, 475.3798, 391.2861                        | 20(S)-sanchirrhinoside A3 or isomer    |
| 145 | 33.07 | 1165.6027 <sup>b/e/f</sup> | C <sub>55</sub> H <sub>92</sub> O <sub>23</sub> | 0.21  | 372.42 | +HCOO | 1119.5959, 1077.5866, 945.5435, 783.4903, 621.4378, 459.3818  | PPD-Ace-xyl-3glc                       |

|     |       |                            |                                                 |       |        |       |                                                              |                                        |
|-----|-------|----------------------------|-------------------------------------------------|-------|--------|-------|--------------------------------------------------------------|----------------------------------------|
| 146 | 33.16 | 1205.5956 <sup>b/e/f</sup> | C <sub>58</sub> H <sub>94</sub> O <sub>26</sub> | −0.38 | 360.77 | −H    | 1119.6002, 1077.5904, 945.5433, 783.4878, 621.4329, 459.3829 | PPD-mal-Ace-xyl-3glc                   |
| 147 | 33.25 | 1033.5594 <sup>c/e/f</sup> | C <sub>50</sub> H <sub>84</sub> O <sub>19</sub> | −0.41 | 344.24 | +HCOO | 987.5530, 945.5432, 783.4897, 621.4373, 459.3846             | PPD-Ace-3glc                           |
| 148 | 33.27 | 1073.5543 <sup>b/e/f</sup> | C <sub>53</sub> H <sub>86</sub> O <sub>22</sub> | 0.47  | 352.29 | −H    | 987.5548, 945.5431, 783.4909, 621.4364, 459.3853             | PPD-mal-Ace-3glc                       |
| 149 | 33.31 | 1117.5441 <sup>b/e/f</sup> | C <sub>54</sub> H <sub>86</sub> O <sub>24</sub> | 0.44  | 337.86 | −H    | 945.5423, 783.4903, 621.4373, 459.3848                       | PPD-Dimal-3glc                         |
| 150 | 33.36 | 1075.5705 <sup>b/e/f</sup> | C <sub>52</sub> H <sub>86</sub> O <sub>20</sub> | 0.94  | 353.87 | +HCOO | 1029.5621, 987.5532, 945.5446, 783.4933, 621.4358, 459.3846  | PPD-2Ace-3glc                          |
| 151 | 33.42 | 1093.5821 <sup>d/f</sup>   | C <sub>52</sub> H <sub>88</sub> O <sub>21</sub> | 1.95  | 338.31 | +HCOO | 1047.5744, 915.5307, 783.4891, 621.4413, 459.3842            | notoginsenoside P or isomer            |
| 152 | 33.57 | 991.5488 <sup>a</sup>      | C <sub>48</sub> H <sub>82</sub> O <sub>18</sub> | −0.15 | 321.69 | +HCOO | 945.5427, 927.5316, 783.4927, 621.4397, 459.3835             | gypenoside XV II                       |
| 153 | 33.59 | 1117.5444 <sup>b/e/f</sup> | C <sub>54</sub> H <sub>86</sub> O <sub>24</sub> | 0.66  | 342.21 | −H    | 945.5448, 621.4384, 459.3850                                 | PPD-Dimal-3glc                         |
| 154 | 33.62 | 1033.5746 <sup>b/f</sup>   | C <sub>50</sub> H <sub>84</sub> O <sub>19</sub> | 0.50  | 341.25 | +HCOO | 987.5539, 945.5434, 783.4908, 621.4373, 459.3844             | PPD-Ace-3glc                           |
| 155 | 33.64 | 1031.5442 <sup>d/f</sup>   | C <sub>51</sub> H <sub>84</sub> O <sub>21</sub> | 0.90  | 331.98 | −H    | 945.5425, 783.4914, 621.4372, 459.3853                       | malonylfloralginsenoside Rd3 or isomer |
| 156 | 33.68 | 1047.5745 <sup>c/f</sup>   | C <sub>52</sub> H <sub>88</sub> O <sub>21</sub> | −0.03 | 348.56 | −H    | 915.5324, 783.4896, 621.4372, 459.3845                       | notoginsenoside P or isomer            |
| 157 | 33.73 | 1133.5780 <sup>b/e/f</sup> | C <sub>55</sub> H <sub>90</sub> O <sub>24</sub> | 2.71  | 339.22 | −H    | 1047.5774, 915.5325, 783.4870, 621.4406, 459.3867            | PPD-mal-2xyl-2glc                      |
| 158 | 33.74 | 1093.5808 <sup>b/e/f</sup> | C <sub>53</sub> H <sub>90</sub> O <sub>23</sub> | 0.68  | 350.95 | −H    | 1047.5753, 915.5323, 783.4909, 621.4373, 459.3840            | PPD-2xyl-2glc                          |
| 159 | 33.76 | 1165.6014 <sup>b/e/f</sup> | C <sub>55</sub> H <sub>92</sub> O <sub>23</sub> | 1.91  | 372.70 | +HCOO | 1119.5978, 1077.5856, 945.5436, 783.4907, 621.4372, 459.3863 | PPD-Ace-xyl-3glc                       |
| 160 | 33.87 | 1075.5682 <sup>b/e/f</sup> | C <sub>52</sub> H <sub>86</sub> O <sub>20</sub> | −1.17 | 359.94 | +HCOO | 1029.5632, 987.5533, 945.5435, 621.4370, 459.3854            | PPD-2Ace-3glc                          |
| 161 | 33.94 | 1117.5432 <sup>b/e/f</sup> | C <sub>54</sub> H <sub>86</sub> O <sub>24</sub> | −0.39 | 337.74 | −H    | 945.5437, 783.4904, 621.4372, 459.3847                       | PPD-Dimal-3glc                         |
| 162 | 33.94 | 1073.5715 <sup>b/e/f</sup> | C <sub>57</sub> H <sub>86</sub> O <sub>19</sub> | 2.28  | 207.00 | −H    | 987.5531, 945.5425, 783.4890, 621.4369, 459.3849             | PPD-mal-Ace-3glc                       |
| 163 | 34.06 | 1075.5842 <sup>b/e/f</sup> | C <sub>52</sub> H <sub>86</sub> O <sub>20</sub> | 5.86  | 359.94 | +HCOO | 1029.5700, 987.5529, 945.5418, 783.4983, 621.4390, 459.3864  | PPD-2Ace-3glc                          |
| 164 | 34.08 | 1031.5460 <sup>d/f</sup>   | C <sub>51</sub> H <sub>84</sub> O <sub>21</sub> | 2.68  | 338.12 | −H    | 945.5442, 783.4894, 621.4401, 459.3868                       | malonylfloralginsenoside Rd1 or isomer |
| 165 | 34.14 | 961.5397 <sup>d/f</sup>    | C <sub>47</sub> H <sub>80</sub> O <sub>17</sub> | 2.00  | 325.41 | +HCOO | 915.5298, 783.4868, 621.4379, 459.3836                       | vinaginsenoside R17 or isomer          |
| 166 | 34.17 | 1117.5445 <sup>b/e/f</sup> | C <sub>54</sub> H <sub>86</sub> O <sub>24</sub> | 0.81  | 338.33 | −H    | 945.5438, 765.4731, 621.4294, 459.3874                       | PPD-Dimal-3glc                         |
| 167 | 34.18 | 1073.5557 <sup>b/e/f</sup> | C <sub>53</sub> H <sub>86</sub> O <sub>22</sub> | 1.77  | 351.78 | −H    | 987.5534, 945.5453, 783.4893, 621.4348, 459.3862             | PPD-mal-Ace-3glc                       |
| 168 | 34.23 | 1093.5818 <sup>b/e/f</sup> | C <sub>53</sub> H <sub>90</sub> O <sub>23</sub> | 1.61  | 337.32 | −H    | 1047.5712, 915.5339, 783.5080, 621.4369, 459.3815            | PPD-2xyl-2glc                          |
| 169 | 34.26 | 1205.5983 <sup>b/e/f</sup> | C <sub>58</sub> H <sub>94</sub> O <sub>26</sub> | 1.86  | 349.05 | −H    | 1119.5945, 1077.5852, 915.5349, 783.4860, 621.4381, 459.3853 | PPD-mal-Ace-3glc-xyl                   |
| 170 | 34.47 | 1115.5664 <sup>b/e/f</sup> | C <sub>55</sub> H <sub>88</sub> O <sub>23</sub> | 1.83  | 362.71 | −H    | 1029.5652, 987.5533, 945.5428, 783.4873, 621.4390, 459.3847  | PPD-mal-2Ace-3glc                      |
| 171 | 34.47 | 1159.5549 <sup>c/e/f</sup> | C <sub>56</sub> H <sub>88</sub> O <sub>25</sub> | 0.61  | 352.77 | −H    | 987.5538, 945.5429, 783.4900, 621.4362, 459.3837             | PPD-Dimal-Ace-3glc                     |

|     |       |                                         |                                                 |       |        |       |                                                              |                                                                |
|-----|-------|-----------------------------------------|-------------------------------------------------|-------|--------|-------|--------------------------------------------------------------|----------------------------------------------------------------|
| 172 | 34.48 | 1119.5673 <sup>c/e/f</sup> <sub>f</sub> | C <sub>58</sub> H <sub>88</sub> O <sub>21</sub> | −6.46 | 351.45 | −H    | 987.5538, 945.5429, 783.4900, 621.4362, 459.3837             | PPD-xyl-Ace-3glc                                               |
| 173 | 34.50 | 1117.5581 <sup>b/f</sup>                | C <sub>51</sub> H <sub>86</sub> O <sub>21</sub> | −0.70 | −      | −H    | 945.5441, 783.4869, 621.4386, 459.3821                       | PPD-Dimal-3glc                                                 |
| 174 | 34.56 | 1075.5715 <sup>b/e/f</sup>              | C <sub>52</sub> H <sub>86</sub> O <sub>20</sub> | 1.94  | 350.72 | +HCOO | 1029.5595, 987.5542, 945.5452, 783.4876, 621.4364, 459.3855  | PPD-2Ace-3glc                                                  |
| 175 | 34.62 | 1205.5963 <sup>b/e/f</sup>              | C <sub>58</sub> H <sub>94</sub> O <sub>26</sub> | 0.20  | 348.95 | −H    | 1119.5990, 1077.5862, 945.5453, 783.4897, 621.4371, 459.3859 | PPD-mal-Ace-xyl-3glc<br>malonylfloralginsenoside Rd2 or isomer |
| 176 | 34.65 | 1031.5446 <sup>d/f</sup>                | C <sub>51</sub> H <sub>84</sub> O <sub>21</sub> | 1.33  | 328.62 | −H    | 945.5423, 783.489, 621.4371, 459.3829                        | PPD-Dimal-3glc                                                 |
| 177 | 34.72 | 1117.5443 <sup>b/e/f</sup>              | C <sub>54</sub> H <sub>86</sub> O <sub>24</sub> | 0.60  | 354.91 | −H    | 945.5452, 783.4901, 621.4369, 459.3809                       | PPD-mal-Ace-3glc                                               |
| 178 | 34.73 | 1073.5553 <sup>b/e/f</sup>              | C <sub>53</sub> H <sub>86</sub> O <sub>22</sub> | 1.40  | 354.93 | −H    | 987.5546, 945.5414, 783.4906, 621.4337, 459.3851             | notoginsenoside Fe                                             |
| 179 | 34.79 | 961.5373 <sup>a</sup>                   | C <sub>47</sub> H <sub>80</sub> O <sub>17</sub> | −2.92 | 322.31 | +HCOO | 915.5296, 783.4889, 621.4361, 459.3817                       | PPD-glurA-Ace-xyl-2glc                                         |
| 180 | 34.84 | 1133.5785 <sup>b/e/f</sup>              | C <sub>55</sub> H <sub>90</sub> O <sub>24</sub> | 3.15  | 340.64 | −H    | 957.5421, 915.5311, 783.4892, 621.4408, 459.3806             | notoginsenoside Fd                                             |
| 181 | 34.86 | 961.5378 <sup>a</sup>                   | C <sub>47</sub> H <sub>80</sub> O <sub>17</sub> | −0.11 | 325.83 | +HCOO | 915.5301, 783.4895, 621.4356, 459.3857                       | PPD-2Ace-2xyl-2glc                                             |
| 182 | 34.87 | 1131.4683 <sup>b/e/f</sup>              | C <sub>49</sub> H <sub>80</sub> O <sub>29</sub> | −2.61 | 334.97 | −H    | 1089.5933, 957.5457, 915.5326, 783.4870, 621.4336, 459.3895  | PPD-mal-2xyl-2glc                                              |
| 183 | 35.13 | 1133.5763 <sup>b/e/f</sup>              | C <sub>55</sub> H <sub>90</sub> O <sub>24</sub> | 1.21  | 334.2  | −H    | 1047.5714, 915.5313, 783.4956, 621.4364, 459.3836            | PPD-xyl-2glc                                                   |
| 184 | 35.14 | 957.5456 <sup>c/e/f</sup>               | C <sub>49</sub> H <sub>82</sub> O <sub>18</sub> | 2.88  | 332.53 | −H    | 915.5307, 783.4903, 621.4365, 459.3840                       | ginsenoside Rd2                                                |
| 185 | 35.29 | 961.5381 <sup>a</sup>                   | C <sub>47</sub> H <sub>80</sub> O <sub>17</sub> | 0.32  | 322.73 | +HCOO | 915.5321, 762.4102, 621.4382, 459.3866                       | PPD-mal-xyl-2glc                                               |
| 186 | 35.43 | 1001.5333 <sup>b/e/f</sup>              | C <sub>50</sub> H <sub>82</sub> O <sub>20</sub> | 0.63  | 319.34 | −H    | 915.5328, 783.4955, 621.4380, 459.3850                       | PPD-Dimal-3glc                                                 |
| 187 | 35.54 | 1117.5466 <sup>b/e/f</sup>              | C <sub>54</sub> H <sub>86</sub> O <sub>24</sub> | 2.66  | 332.19 | −H    | 945.5385, 783.4889, 621.4386, 459.3772                       | ginsenoside Rb4 or isomer                                      |
| 188 | 35.56 | 1107.5993 <sup>d/f</sup>                | C <sub>54</sub> H <sub>92</sub> O <sub>23</sub> | 3.30  | 350.34 | −H    | 1061.5912, 929.5502, 783.4905, 621.4363, 459.3829            | PPD-2xyl-2glc                                                  |
| 189 | 35.60 | 1093.5801 <sup>b/e/f</sup>              | C <sub>53</sub> H <sub>90</sub> O <sub>23</sub> | 0.12  | 338.01 | −H    | 1047.5758, 915.5321, 783.4890, 621.4381, 459.3849            | PPD-xyl-Ace-2glc                                               |
| 190 | 35.62 | 1003.5460 <sup>c/e/f</sup> <sub>f</sub> | C <sub>49</sub> H <sub>82</sub> O <sub>18</sub> | 0.06  | 339.24 | +HCOO | 957.5429, 825.5001, 783.4907, 621.4374, 459.3841             | PPD-Ace-xyl-2glc                                               |
| 191 | 35.62 | 957.5430 <sup>c/e/f</sup>               | C <sub>49</sub> H <sub>82</sub> O <sub>18</sub> | 0.17  | 333.21 | −H    | 915.5324, 783.4907, 621.4374, 459.3841                       | PPD-Ace-3glc                                                   |
| 192 | 35.83 | 1033.5607 <sup>b/f</sup>                | C <sub>50</sub> H <sub>84</sub> O <sub>19</sub> | 0.81  | 344.07 | +HCOO | 987.5542, 945.5422, 783.4919, 621.4376, 459.3827             | PPD-xyl-Ace-2glc                                               |
| 193 | 35.91 | 1003.5460 <sup>c/e/f</sup> <sub>f</sub> | C <sub>49</sub> H <sub>82</sub> O <sub>18</sub> | 0.17  | 331.47 | +HCOO | 957.5430, 825.4987, 783.4922, 621.4386, 459.3854             | PPD-Dimal-xyl-2glc                                             |
| 194 | 35.94 | 1087.5342 <sup>b/e/f</sup>              | C <sub>53</sub> H <sub>84</sub> O <sub>23</sub> | 1.06  | 335.49 | −H    | 915.5337, 783.4925, 621.4376, 459.3854                       | PPD-Dimal-xyl-2glc                                             |
| 195 | 36.03 | 1087.5500 <sup>b/e/f</sup>              | C <sub>57</sub> H <sub>84</sub> O <sub>20</sub> | 1.55  | 335.49 | −H    | 915.5311, 783.5023, 621.4356, 459.3858                       | PPD-mal-xyl-2glc                                               |
| 196 | 36.14 | 1001.5326 <sup>b/e/f</sup>              | C <sub>50</sub> H <sub>82</sub> O <sub>20</sub> | −0.07 | 331.19 | −H    | 915.5347, 783.4903, 621.4380, 459.3852                       | PPD-Dimal-xyl-2glc                                             |
| 197 | 36.27 | 1087.5342 <sup>b/e/f</sup>              | C <sub>53</sub> H <sub>84</sub> O <sub>23</sub> | 1.05  | 326.23 | −H    | 915.5283, 783.4935, 621.4361, 459.3896                       | PPD-xyl-2glc                                                   |
| 198 | 36.40 | 1001.5322 <sup>b/e/f</sup>              | C <sub>50</sub> H <sub>82</sub> O <sub>20</sub> | −0.47 | 317.59 | −H    | 915.5261, 783.4832, 621.4363, 459.3820                       | PPD-rha-2glc                                                   |
| 199 | 36.43 | 975.5680 <sup>b/e/f</sup>               | C <sub>48</sub> H <sub>82</sub> O <sub>17</sub> | 2.77  | 329.90 | +HCOO | 929.5505, 783.4911, 621.4366, 459.3833                       | PPD-mal-Ace-3glc                                               |
| 200 | 36.51 | 1073.5566 <sup>b/e/f</sup>              | C <sub>53</sub> H <sub>86</sub> O <sub>22</sub> | 2.61  | 354.99 | −H    | 987.5517, 945.5475, 783.4876, 621.4338, 459.3860             | PPD-Dimal-xyl-2glc                                             |
| 201 | 36.74 | 1087.5351 <sup>b/e/f</sup>              | C <sub>53</sub> H <sub>84</sub> O <sub>23</sub> | 1.85  | 329.07 | −H    | 915.5280, 783.4866, 621.4361, 459.3827                       |                                                                |

|     |       |                            |                                                 |       |        |       |                                                   |                           |
|-----|-------|----------------------------|-------------------------------------------------|-------|--------|-------|---------------------------------------------------|---------------------------|
| 202 | 36.84 | 829.4961 <sup>a</sup>      | C <sub>42</sub> H <sub>72</sub> O <sub>13</sub> | 0.73  | 306.82 | +HCOO | 783.4929, 621.4385, 459.3844, 375.2900            | ginsenoside F2            |
| 203 | 37.07 | 1015.5495 <sup>b/e/f</sup> | C <sub>51</sub> H <sub>84</sub> O <sub>20</sub> | 1.16  | 339.42 | −H    | 929.5497, 783.4898, 621.4363, 459.3850            | PPD-mal-rha-2glc          |
| 204 | 37.15 | 1101.5507 <sup>b/e/f</sup> | C <sub>54</sub> H <sub>86</sub> O <sub>23</sub> | 1.82  | 341.83 | −H    | 929.5503, 783.4887, 621.4401, 459.3838            | PPD-Dimal-rha-2glc        |
| 205 | 37.18 | 871.5053 <sup>b/e/f</sup>  | C <sub>44</sub> H <sub>74</sub> O <sub>14</sub> | 1.96  | 317.61 | +HCOO | 825.5022, 783.4867, 763.4077, 621.4384, 459.3845  | PPD-Ace-2glc              |
| 206 | 37.28 | 1015.5488 <sup>b/e/f</sup> | C <sub>51</sub> H <sub>84</sub> O <sub>20</sub> | 0.48  | 336.21 | −H    | 929.5489, 783.4937, 621.4384, 459.3852            | PPD-mal-rha-2glc          |
| 207 | 37.43 | 1059.5769 <sup>d/f</sup>   | C <sub>52</sub> H <sub>86</sub> O <sub>19</sub> | −0.94 | 352.06 | +HCOO | 1013.5681, 945.5435, 783.4935, 621.4352, 459.3854 | quinquenoside I or isomer |
| 208 | 37.67 | 869.4914 <sup>b/e/f</sup>  | C <sub>45</sub> H <sub>74</sub> O <sub>18</sub> | 1.14  | 310.02 | −H    | 783.4901, 621.4354, 459.3837                      | PPD-mal-2glc              |
| 209 | 37.75 | 871.5049 <sup>b/e/f</sup>  | C <sub>44</sub> H <sub>74</sub> O <sub>14</sub> | −3.13 | 318.66 | +HCOO | 825.4980, 783.4939, 621.4325, 459.3869            | PPD-Ace-2glc              |
| 210 | 37.83 | 829.4954 <sup>a</sup>      | C <sub>43</sub> H <sub>74</sub> O <sub>15</sub> | −0.15 | 305.11 | +HCOO | 783.4895, 621.4386, 459.3843                      | 20(S)-ginsenoside Rg3     |
| 211 | 37.93 | 955.4918 <sup>b/e/f</sup>  | C <sub>48</sub> H <sub>76</sub> O <sub>19</sub> | 1.03  | 314.77 | −H    | 783.5115, 621.4362, 459.3832                      | PPD-Dimal-2glc            |
| 212 | 38.16 | 829.4950 <sup>a</sup>      | C <sub>43</sub> H <sub>74</sub> O <sub>15</sub> | −0.64 | 301.13 | +HCOO | 783.4913, 621.4358, 459.3842                      | 20(R)-ginsenoside Rg3     |
| 213 | 38.44 | 871.5056 <sup>b/f</sup>    | C <sub>44</sub> H <sub>74</sub> O <sub>14</sub> | −0.95 | 320.28 | +HCOO | 825.4998, 783.4899, 621.4381, 459.3847            | PPD-Ace-2glc              |
| 214 | 38.54 | 955.4925 <sup>b/e/f</sup>  | C <sub>48</sub> H <sub>76</sub> O <sub>19</sub> | 1.76  | 316.29 | −H    | 783.4930, 621.4353, 459.3849                      | PPD-Dimal-2glc            |
| 215 | 38.58 | 869.4916 <sup>b/e/f</sup>  | C <sub>45</sub> H <sub>74</sub> O <sub>18</sub> | 1.37  | 306.02 | −H    | 783.4867, 621.4305, 459.3837                      | PPD-mal-2glc              |
| 216 | 39.05 | 799.4858 <sup>b/e/f</sup>  | C <sub>42</sub> H <sub>72</sub> O <sub>14</sub> | 1.11  | 304.12 | −H    | 753.4762, 621.4373, 459.3840                      | PPD-xyl-glc               |
| 217 | 39.45 | 799.4856 <sup>d/f</sup>    | C <sub>42</sub> H <sub>72</sub> O <sub>14</sub> | 0.88  | 304.95 | +HCOO | 753.4789, 621.4361, 459.3843                      | gypenoside XIII or isomer |
| 218 | 40.76 | 811.4987 <sup>a</sup>      | C <sub>42</sub> H <sub>70</sub> O <sub>12</sub> | 1.76  | 315.78 | +HCOO | 765.4808, 603.4288                                | ginsenoside Rk1           |
| 219 | 41.81 | 753.4446 <sup>d/f</sup>    | C <sub>40</sub> H <sub>66</sub> O <sub>13</sub> | 2.04  | 287.12 | −H    | 621.4371, 459.3814                                | gypenoside XIII or isomer |

a: Identification assisted with reference compounds comparison; b: Components identified in the "Unknown Components" section of the DDA data; c: Components identified in HDMS<sup>E</sup> data; d: Components identified in the "Identified Components" section of the DDA data; e: The reported components may not have been isolated from *Panax ginseng*; f: Tentative characterization by analyzing the high-accuracy MS<sup>2</sup> data.

**Table S3.** Information for the 40 prototype components characterized from rat plasma.

| No. | Observed RT (min) | Observed m/z           | Formula                                          | Mass error (ppm) | CCA (Å <sup>2</sup> ) | Adducts | ESI-MS <sup>2</sup>                                                               | Identification                         |
|-----|-------------------|------------------------|--------------------------------------------------|------------------|-----------------------|---------|-----------------------------------------------------------------------------------|----------------------------------------|
| 4   | 5.25              | 977.5315 <sup>a</sup>  | C <sub>47</sub> H <sub>80</sub> O <sub>18</sub>  | −1.15            | 322.41                | +HCOO   | 931.5263, 799.4839, 637.4322, 475.3793, 391.2845                                  | notoginsenoside R1                     |
| 6   | 5.65              | 991.5484 <sup>a</sup>  | C <sub>48</sub> H <sub>82</sub> O <sub>18</sub>  | 0.06             | 327.00                | +HCOO   | 945.5429, 799.4842, 637.4319, 619.4202, 475.3887, 391.2848                        | ginsenoside Re                         |
| 7   | 5.69              | 845.4997 <sup>a</sup>  | C <sub>42</sub> H <sub>72</sub> O <sub>14</sub>  | 0.21             | 297.89                | +HCOO   | 799.4851, 637.4321, 475.3798, 391.2867                                            | ginsenoside Rg1                        |
| 31  | 10.81             | 1285.6450 <sup>a</sup> | C <sub>59</sub> H <sub>100</sub> O <sub>27</sub> | 0.95             | 372.56                | +HCOO   | 1239.6391, 1107.5986, 945.5443, 783.4914, 621.4364, 459.3857, 353.1086            | notoginsenosides R4                    |
| 38  | 12.84             | 1285.6410 <sup>a</sup> | C <sub>59</sub> H <sub>100</sub> O <sub>27</sub> | −0.53            | 372.92                | +HCOO   | 1239.6357, 1107.5938, 945.5416, 783.4887, 621.4366, 459.3876                      | notoginsenoside Fa                     |
| 39  | 13.03             | 1341.6670 <sup>b</sup> | C <sub>63</sub> H <sub>106</sub> O <sub>30</sub> | −2.32            | 384.79                | −H      | 1341.6664, 1209.6253, 1077.5841, 945.5425, 783.4892, 621.4363, 459.3841           | PPD-3xyl-2glc                          |
| 48  | 15.40             | 1255.6320 <sup>a</sup> | C <sub>58</sub> H <sub>98</sub> O <sub>26</sub>  | 0.67             | 365.25                | +HCOO   | 1209.6261, 1077.5841, 945.5425, 783.4896, 621.4359, 459.3872                      | notoginsenoside FP2                    |
| 49  | 15.63             | 1387.6910 <sup>a</sup> | C <sub>63</sub> H <sub>106</sub> O <sub>30</sub> | −0.53            | 302.07                | +HCOO   | 1341.6689, 1209.6272, 1077.5856, 945.5442, 783.4902, 765.4810, 621.4379, 459.3851 | notoginsenoside Fh1                    |
| 50  | 16.10             | 1153.6020 <sup>a</sup> | C <sub>54</sub> H <sub>92</sub> O <sub>23</sub>  | −0.60            | 355.55                | +HCOO   | 1107.5950, 1089.5862, 945.5424, 783.4899, 621.4378, 459.3842                      | ginsenoside Rb1                        |
| 51  | 16.26             | 1325.6380 <sup>b</sup> | C <sub>62</sub> H <sub>102</sub> O <sub>30</sub> | −0.58            | 373.85                | −H      | 1239.6383, 1107.5957, 945.5436, 783.4907, 621.4373, 459.3849                      | malonylginsenoside Ra3 or isomer       |
| 52  | 16.38             | 1255.6320 <sup>b</sup> | C <sub>58</sub> H <sub>98</sub> O <sub>26</sub>  | 0.12             | 361.25                | +HCOO   | 1209.6275, 1077.5861, 945.5440, 783.4904, 621.4373, 459.3847                      | notoginsenoside-FZ or isomer           |
| 56  | 17.58             | 955.4923 <sup>a</sup>  | C <sub>48</sub> H <sub>76</sub> O <sub>19</sub>  | 1.54             | 200.20                | −H      | 955.4915, 793.4887, 613.3763, 569.3852, 523.3783, 497.3650, 455.3536              | ginsenoside Ro                         |
| 59  | 18.13             | 1193.5970 <sup>a</sup> | C <sub>57</sub> H <sub>94</sub> O <sub>26</sub>  | 0.49             | 265.46                | −H      | 1107.5965, 945.5437, 783.4904, 621.4378, 459.3853                                 | malonylginsenoside Rb1                 |
| 61  | 18.40             | 1255.6320 <sup>a</sup> | C <sub>58</sub> H <sub>98</sub> O <sub>26</sub>  | 0.80             | 368.97                | +HCOO   | 1209.6268, 1077.5853, 945.5437, 783.4903, 765.4802, 621.4368, 459.3845            | notoginsenoside Fc                     |
| 64  | 19.34             | 1123.5890 <sup>a</sup> | C <sub>53</sub> H <sub>90</sub> O <sub>22</sub>  | 0.37             | 275.15                | +HCOO   | 1077.5830, 945.5417, 783.4889, 653.4628, 537.3445, 459.3856                       | ginsenoside Rc                         |
| 66  | 19.80             | 1255.6320 <sup>a</sup> | C <sub>58</sub> H <sub>98</sub> O <sub>26</sub>  | 0.32             | 363.00                | +HCOO   | 1209.6260, 1077.5844, 945.5436, 783.4892, 621.4370, 459.3845                      | ginsenoside Ra1                        |
| 68  | 20.14             | 1193.5950 <sup>b</sup> | C <sub>57</sub> H <sub>94</sub> O <sub>26</sub>  | −0.68            | –                     | −H      | 1149.6070, 1107.5955, 945.5430, 783.4901, 621.4373, 459.3847                      | malonylfloralginsenoside Rb2 or isomer |
| 71  | 20.92             | 1387.6720 <sup>a</sup> | C <sub>63</sub> H <sub>106</sub> O <sub>30</sub> | −1.50            | 381.91                | +HCOO   | 1341.6676, 1209.6257, 1077.5843, 945.5428, 783.4897, 621.4367, 459.3850           | notoginsenoside S                      |
| 73  | 21.19             | 683.4455 <sup>a</sup>  | C <sub>36</sub> H <sub>62</sub> O <sub>9</sub>   | −0.48            | 275.30                | +HCOO   | 637.4327, 621.4337, 475.3801, 391.2873                                            | ginsenoside F1                         |
| 75  | 21.62             | 1295.6270 <sup>b</sup> | C <sub>61</sub> H <sub>100</sub> O <sub>29</sub> | −0.42            | 374.67                | −H      | 1209.6284, 1077.5854, 945.5435, 783.4897, 621.4372, 459.3849                      | PPD-mal-2xyl-3glc                      |



|     |       |                        |                                                  |       |        |       |                                                              |                                        |
|-----|-------|------------------------|--------------------------------------------------|-------|--------|-------|--------------------------------------------------------------|----------------------------------------|
| 77  | 21.97 | 1163.5860 <sup>b</sup> | C <sub>56</sub> H <sub>92</sub> O <sub>25</sub>  | 0.44  | –      | –H    | 1077.5853, 945.5437, 783.4878, 621.4337, 459.3830            | malonylginsenoside Rb2 or isomer       |
| 84  | 22.28 | 1123.5890 <sup>a</sup> | C <sub>53</sub> H <sub>90</sub> O <sub>22</sub>  | 0.04  | 359.67 | +HCOO | 1077.5821, 945.5406, 783.4878, 621.4378, 459.3845            | ginsenoside Rb2                        |
| 85  | 22.58 | 1295.6250 <sup>b</sup> | C <sub>61</sub> H <sub>100</sub> O <sub>29</sub> | –1.89 | 362.70 | –H    | 1209.6273, 1077.5848, 945.5426, 783.4900, 621.4372, 459.3836 | PPD-mal-2xyl-3glc                      |
| 87  | 23.13 | 1163.5850 <sup>b</sup> | C <sub>56</sub> H <sub>92</sub> O <sub>25</sub>  | –0.77 | –      | –H    | 1077.5843, 945.5442, 783.4853, 621.4353, 459.3890            | malonylfloralginsenoside Rc3 or isomer |
| 90  | 23.43 | 1123.5890 <sup>a</sup> | C <sub>53</sub> H <sub>90</sub> O <sub>22</sub>  | –1.29 | 347.37 | +HCOO | 1077.5834, 945.5422, 783.4891, 621.4364, 459.3842            | ginsenoside Rb3                        |
| 94  | 24.24 | 1295.6270 <sup>b</sup> | C <sub>61</sub> H <sub>100</sub> O <sub>29</sub> | –0.66 | –      | –H    | 1209.6274, 1077.5854, 945.5438, 783.4898, 621.4371, 459.3848 | PPD-mal-2xyl-3glc                      |
| 97  | 24.54 | 1123.6080 <sup>b</sup> | C <sub>53</sub> H <sub>90</sub> O <sub>22</sub>  | 1.30  | 357.12 | +HCOO | 1077.5865, 945.5421, 783.4893, 621.4356, 459.3807            | notoginsenoside L or isomer            |
| 98  | 24.60 | 1255.6310 <sup>b</sup> | C <sub>58</sub> H <sub>98</sub> O <sub>26</sub>  | –1.45 | 284.63 | +HCOO | 1209.6256, 1077.5844, 945.5424, 783.4896, 621.4362, 459.3839 | notoginsenoside-FZ or isomer           |
| 104 | 26.10 | 1163.5840 <sup>b</sup> | C <sub>56</sub> H <sub>92</sub> O <sub>25</sub>  | –1.11 | 279.06 | –H    | 1077.5843, 945.5430, 783.4901, 621.4371, 459.3841            | malonylfloralginsenoside Rc2 or isomer |
| 108 | 27.10 | 1163.5840 <sup>b</sup> | C <sub>56</sub> H <sub>92</sub> O <sub>25</sub>  | –1.50 | 267.37 | –H    | 1077.5833, 945.5418, 783.4889, 621.4364, 459.3841            | malonylfloralginsenoside Rc1 or isomer |
| 113 | 27.80 | 1163.5850 <sup>b</sup> | C <sub>56</sub> H <sub>92</sub> O <sub>25</sub>  | –0.16 | 278.78 | –H    | 1077.5831, 945.5420, 783.4892, 621.4264, 459.3834            | malonylfloralginsenoside Rc4 or isomer |
| 127 | 30.27 | 1031.5440 <sup>a</sup> | C <sub>51</sub> H <sub>84</sub> O <sub>21</sub>  | 1.00  | 340.41 | –H    | 945.5435, 783.4904, 621.4387, 459.3845                       | malonylginsenoside Rd                  |
| 140 | 32.36 | 1033.5570 <sup>b</sup> | C <sub>50</sub> H <sub>84</sub> O <sub>19</sub>  | 1.01  | 213.18 | +HCOO | 987.5544, 945.5428, 783.4905, 621.4370, 459.3838             | quinquenoside III or isomer            |
| 179 | 34.58 | 961.5373 <sup>a</sup>  | C <sub>47</sub> H <sub>80</sub> O <sub>17</sub>  | –2.92 | 322.31 | +HCOO | 915.5296, 783.4889, 621.4361, 459.3817                       | notoginsenoside Fe                     |
| 185 | 35.36 | 961.5381 <sup>a</sup>  | C <sub>47</sub> H <sub>80</sub> O <sub>17</sub>  | 0.32  | 322.73 | +HCOO | 915.5321, 621.4382, 459.3866                                 | ginsenoside Rd2                        |
| 186 | 35.64 | 1001.5330 <sup>b</sup> | C <sub>50</sub> H <sub>82</sub> O <sub>20</sub>  | 0.63  | 319.34 | –H    | 915.5328, 783.4955, 621.4380, 459.3850                       | PPD-mal-xyl-2glc                       |
| 189 | 35.45 | 1093.5800 <sup>b</sup> | C <sub>53</sub> H <sub>90</sub> O <sub>23</sub>  | 0.12  | 338.01 | +HCOO | 1047.5758, 915.5321, 783.4890, 621.4381, 459.3849            | notoginsenoside P or isomer            |
| 196 | 36.25 | 1001.5330 <sup>b</sup> | C <sub>50</sub> H <sub>82</sub> O <sub>20</sub>  | –0.07 | 331.19 | –H    | 915.5347, 783.4903, 621.4380, 459.3852                       | PPD-mal-xyl-2glc                       |
| 202 | 36.76 | 829.4961 <sup>a</sup>  | C <sub>42</sub> H <sub>72</sub> O <sub>13</sub>  | 0.73  | 306.82 | +HCOO | 783.4929, 621.4385, 459.3844, 375.2900                       | ginsenoside F2                         |
| 217 | 39.39 | 799.4856 <sup>b</sup>  | C <sub>42</sub> H <sub>72</sub> O <sub>14</sub>  | 0.88  | 304.95 | +HCOO | 753.4789, 621.4361, 459.3843                                 | gypenoside XIII or isomer              |

Note: The number is the same as that in the identification list Tab.1 of the flower buds of *Panax notoginseng*; a: Identification assisted with reference compounds comparison; b: Tentative characterization by analyzing the high-accuracy MS<sup>2</sup> data.

Table S4. Information for 11 metabolites identified from rat plasma.

| No. | Observed RT (min) | Observed <i>m/z</i>    | Formula                                         | Mass error (ppm) | CCA (Å <sup>2</sup> ) | Adducts | ESI-MS <sup>2</sup>                               | Metabolic pathways                            | Identification                            |
|-----|-------------------|------------------------|-------------------------------------------------|------------------|-----------------------|---------|---------------------------------------------------|-----------------------------------------------|-------------------------------------------|
| M1  | 5.25              | 977.5306 <sup>b</sup>  | C <sub>48</sub> H <sub>82</sub> O <sub>20</sub> | 1.07             | 324.23                | −H      | 931.5275, 827.5607, 799.4864, 637.4317, 475.3791  | ginsenoside Re+2O                             | PPT+2O+2glc+rh                            |
| M2  | 15.97             | 1107.5940 <sup>a</sup> | C <sub>54</sub> H <sub>92</sub> O <sub>23</sub> | 2.88             | 350.46                | −H      | 945.5427, 783.4901, 621.4381, 459.3851            | notoginsenoside Fa-xyl/notoginsenoside R4-xyl | ginsenoside Rb1                           |
| M3  | 18.45             | 1209.6230 <sup>b</sup> | C <sub>58</sub> H <sub>98</sub> O <sub>26</sub> | −3.10            | 369.83                | −H      | 1077.5825, 945.5409, 783.4882, 621.4354, 459.3841 | notoginsenoside Fh1-xyl                       | ginsenoside Ra1/notoginsenoside-FZ isomer |
| M4  | 19.35             | 1077.5820 <sup>b</sup> | C <sub>53</sub> H <sub>90</sub> O <sub>22</sub> | −1.90            | 342.67                | −H      | 945.5422, 783.4883, 621.4358, 459.3844            | notoginsenoside Fc-xyl/notoginsenoside Fa-glc | vinaginsenoside R7                        |
| M5  | 23.41             | 783.4890 <sup>b</sup>  | C <sub>42</sub> H <sub>72</sub> O <sub>13</sub> | 3.90             | 308.67                | −H      | 783.4902, 708.3636, 642.3125                      | ginsenoside Re-glc                            | ginsenoside Rg2                           |
| M6  | 26.10             | 793.4401 <sup>b</sup>  | C <sub>44</sub> H <sub>66</sub> O <sub>14</sub> | 4.82             | 287.58                | −H      | −                                                 | ginsenoside Ro-glc                            | zingibroside R1                           |
| M7  | 28.38             | 991.5469 <sup>b</sup>  | C <sub>48</sub> H <sub>82</sub> O <sub>18</sub> | −0.80            | 327.01                | +HCOO   | 945.5423, 783.4890, 621.4370, 459.3858            | ginsenoside Rb2-ara                           | ginsenoside Rd                            |
| M8  | 28.50             | 991.5469 <sup>b</sup>  | C <sub>48</sub> H <sub>82</sub> O <sub>18</sub> | −2.00            | 325.96                | +HCOO   | 945.5423, 783.4890, 621.4370, 459.3858            | ginsenoside Rb1-glc                           | gypenoside XVII                           |
| M9  | 34.58             | 915.5311 <sup>b</sup>  | C <sub>47</sub> H <sub>80</sub> O <sub>17</sub> | 1.41             | 319.12                | −H      | 837.4027, 716.3645, 621.4389, 459.3852            | notoginsenoside R4-2glc                       | PPD+mal+2glc+Xyl                          |
| M10 | 37.55             | 869.4884 <sup>b</sup>  | C <sub>45</sub> H <sub>74</sub> O <sub>16</sub> | 3.47             | 308.83                | −H      | 845.6852                                          | malonylginsenoside Rd-glc                     | PPD+mal+2glc                              |
| M11 | 37.88             | 885.5227 <sup>b</sup>  | C <sub>46</sub> H <sub>78</sub> O <sub>16</sub> | 3.02             | 321.52                | −H      | 830.3231, 753.4815                                | notoginsenoside P-glc                         | PPD+glc+2xyl                              |

a: Identification assisted with reference compounds comparison; b: Tentative characterization by analyzing the high-accuracy MS<sup>2</sup> data.

**Table S5.** CCS prediction of isomers in rat plasma based on ALLCCS and CCSbase.

| No. | Observed RT (min) | Observed m/z           | Formula                                          | Adducts | Observed CCA (Å <sup>2</sup> ) | Predicted CCA (Å <sup>2</sup> ) |                               |                            | Identification      |
|-----|-------------------|------------------------|--------------------------------------------------|---------|--------------------------------|---------------------------------|-------------------------------|----------------------------|---------------------|
|     |                   |                        |                                                  |         |                                | ALLCCS [M-H] <sup>-</sup>       | ALLCCS [H+HCOOH] <sup>-</sup> | CCSbase [M-H] <sup>-</sup> |                     |
| 31  | 10.81             | 1285.6450 <sup>a</sup> | C <sub>59</sub> H <sub>100</sub> O <sub>27</sub> | +HCOO   | 372.56                         | –                               | –                             | 331.9                      | notoginsenosides R4 |
| 38  | 12.84             | 1285.6410 <sup>a</sup> | C <sub>59</sub> H <sub>100</sub> O <sub>27</sub> | +HCOO   | 372.92                         | –                               | –                             | 331.9                      | notoginsenoside Fa  |
| 48  | 15.40             | 1255.6320 <sup>a</sup> | C <sub>58</sub> H <sub>98</sub> O <sub>26</sub>  | +HCOO   | 365.25                         | –                               | –                             | 325.4                      | notoginsenoside FP2 |
| 61  | 18.4              | 1255.6320 <sup>a</sup> | C <sub>58</sub> H <sub>98</sub> O <sub>26</sub>  | +HCOO   | 368.97                         | –                               | –                             | 327.0                      | notoginsenoside Fc  |
| 66  | 19.8              | 1255.6320 <sup>a</sup> | C <sub>58</sub> H <sub>98</sub> O <sub>26</sub>  | +HCOO   | 363.00                         | –                               | –                             | 327.0                      | ginsenoside Ra1     |
| 84  | 22.28             | 1123.5890 <sup>a</sup> | C <sub>53</sub> H <sub>90</sub> O <sub>22</sub>  | +HCOO   | 359.67                         | 273.9                           | 287.9                         | 301.4                      | ginsenoside Rb2     |
| 90  | 23.43             | 1123.5890 <sup>a</sup> | C <sub>53</sub> H <sub>90</sub> O <sub>22</sub>  | +HCOO   | 347.37                         | 273.9                           | 287.9                         | 301.4                      | ginsenoside Rb3     |
| 97  | 24.54             | 1123.6080 <sup>b</sup> | C <sub>53</sub> H <sub>90</sub> O <sub>22</sub>  | +HCOO   | 357.12                         | 273.9                           | 287.9                         | 301.4                      | notoginsenoside L   |
| M4  | 19.35             | 1077.5820 <sup>b</sup> | C <sub>53</sub> H <sub>90</sub> O <sub>22</sub>  | –H      | 342.67                         | 271.7                           | 285.7                         | 301.4                      | vinaginsenoside R7  |
| 179 | 34.58             | 961.5373 <sup>a</sup>  | C <sub>47</sub> H <sub>80</sub> O <sub>17</sub>  | +HCOO   | 322.31                         | 252.0                           | 266.1                         | 271.0                      | notoginsenoside Fe  |
| 185 | 35.36             | 961.5381 <sup>a</sup>  | C <sub>47</sub> H <sub>80</sub> O <sub>17</sub>  | +HCOO   | 322.73                         | 252.1                           | 266.2                         | 271.9                      | ginsenoside Rd2     |
| M7  | 28.38             | 991.5469 <sup>b</sup>  | C <sub>48</sub> H <sub>82</sub> O <sub>18</sub>  | +HCOO   | 327.01                         | 255.4                           | 269.6                         | 274.4                      | ginsenoside Rd      |
| M8  | 28.50             | 991.5469 <sup>b</sup>  | C <sub>48</sub> H <sub>82</sub> O <sub>18</sub>  | +HCOO   | 325.96                         | 257.6                           | 269.6                         | 274.4                      | gypenoside XVII     |
| 6   | 5.65              | 991.5484 <sup>a</sup>  | C <sub>48</sub> H <sub>82</sub> O <sub>18</sub>  | +HCOO   | 327.00                         | 256.4                           | 270.5                         | 274.5                      | ginsenoside Re      |
| 202 | 36.76             | 829.4961 <sup>a</sup>  | C <sub>42</sub> H <sub>72</sub> O <sub>13</sub>  | +HCOO   | 306.82                         | 237.5                           | 250.3                         | 252.6                      | ginsenoside F2      |
| M5  | 23.41             | 783.4890 <sup>b</sup>  | C <sub>42</sub> H <sub>72</sub> O <sub>13</sub>  | –H      | 308.67                         | 239.0                           | 251.8                         | 251.6                      | ginsenoside Rg2     |

Note: The number is the same as that in the identification list Tab.1 and Tab.3.; a: Identification assisted with reference compounds comparison; b: Tentative characterization by analyzing the high-accuracy MS<sup>2</sup> data.
